# 1 Transcriptome association studies of 2 neuropsychiatric traits in African 3 Americans implicate *PRMT7* in 4 schizophrenia

5 Peter N. Fiorica<sup>1,2</sup> and Heather E. Wheeler<sup>2,3,4,5</sup>

6 <sup>1</sup>Department of Chemistry and Biochemistry, Loyola University Chicago, Chicago, IL

7 <sup>2</sup>Department of Biology, Loyola University Chicago, Chicago, IL

8 <sup>3</sup>Program in Bioinformatics, Loyola University Chicago, Chicago, IL

9 <sup>4</sup>Department of Computer Science, Loyola University Chicago, Chicago, IL

10 <sup>5</sup>Department of Public Health Sciences, Loyola University Chicago, Maywood, IL

11 Corresponding author:

12 Heather E. Wheeler<sup>2,3,4,5</sup>

13 Email address: hwheeler1@luc.edu

## 14 ABSTRACT

15 In the past fifteen years, genome-wide association studies (GWAS) have provided novel insight into  
16 the genetic architecture of various complex traits; however, this insight has been primarily focused on  
17 populations of European descent. This emphasis on European populations has led to individuals of  
18 recent African descent being grossly underrepresented in the study of genetics. With African Americans  
19 making up less than two percent of participants in neuropsychiatric GWAS, this discrepancy is magnified  
20 in diseases such as schizophrenia and bipolar disorder. In this study, we performed GWAS and the  
21 gene-based association method PrediXcan for schizophrenia ( $n=2,256$ ) and bipolar disorder ( $n=1,019$ ) in  
22 African American cohorts. In our PrediXcan analyses, we identified *PRMT7* ( $P = 5.5 \times 10^{-6}$ , local false  
23 sign rate = 0.12) as significantly associated with schizophrenia following an adaptive shrinkage multiple  
24 testing adjustment. This association with schizophrenia was confirmed in the much larger, predominantly  
25 European, Psychiatric Genomics Consortium. In addition to the *PRMT7* association with schizophrenia,  
26 we identified rs10168049 ( $P = 1.0 \times 10^{-6}$ ) as a potential candidate locus for bipolar disorder with highly  
27 divergent allele frequencies across populations, highlighting the need for diversity in genetic studies.

## 28 INTRODUCTION

29 Individuals of recent African ancestry have been grossly underrepresented in genomic studies. African  
30 American participants make up about 2.0% of all GWAS subjects (Sirugo et al., 2019). Specifically,  
31 individuals of African ancestry make up only 1.2% of all neuropsychiatric GWAS (Quansah and Mc-  
32 Gregor, 2018). With the advent of polygenic risk scores, accuracy in disease prediction is critical to the  
33 development of precision medicine (Khera et al., 2018); however, the lack of representative diversity in  
34 the study of genomics has impacted the accuracy of genetic risk prediction across diverse populations.  
35 Despite similar incidences of schizophrenia across European and African ancestry populations (De Candia  
36 et al., 2013; Whiteford et al., 2013), Africans have been predicted to have significantly less disease risk  
37 than their European counterparts using current GWAS summary statistics (Martin et al., 2017). Inaccuracy  
38 in predicting disease risk across populations can lead to further disparities in health and treatment of  
39 underrepresented populations. To prevent misclassification of genetic risk, further work in the genetics un-  
40 derlying complex traits in African Americans is needed (Manrai et al., 2016). In an attempt to address this  
41 discrepancy in genetic risk prediction, we performed a series of genetic association tests for schizophrenia  
42 and bipolar disorder in two cohorts of African American individuals (Manolio et al., 2007; Suarez et al.,  
43 2006; Smith et al., 2009).

44 Schizophrenia and bipolar disorder are two heritable neuropsychiatric disorders whose genetic com-

ponents have been attributed to the cumulative effect of thousands of loci across the genome (Ripke et al., 2014; Zhiqiang et al., 2017; Ikeda et al., 2017b). Past work shows that the genetic architectures of these two disorders significantly overlap (Bhalala et al., 2018; Allardyce et al., 2018; Consortium, 2009; Stahl et al., 2019). Up to this point, the largest GWAS of schizophrenia and bipolar disorder comprise hundreds of thousands of individuals primarily of European descent (Stahl et al., 2019; Ripke et al., 2014; Zhiqiang et al., 2017). While studies of neuropsychiatric diseases in European and Asian ancestry populations continue to grow, the scarcity of studies in African American populations persists (Ikeda et al., 2017a).

To date, one of the largest GWAS of schizophrenia in an African American population was completed by the Genetic Association Information Network (GAIN) (Manolio et al., 2007); however, this study found no SNPs to be genome-wide significant and offered little insight into the potential function of genes in schizophrenia in African Americans. The GAIN has also performed one of the largest GWAS of bipolar disorder in African Americans (Manolio et al., 2007; Smith et al., 2009). Similar to the findings of the GAIN GWAS of schizophrenia, Smith et al. found no SNPs significantly associated with bipolar disorder (Smith et al., 2009). In addition to a traditional GWAS using a logistic regression, we performed two gene-level association tests: PrediXcan and MultiXcan (Gamazon et al., 2015; Barbeira et al., 2019). PrediXcan offers a series of advantages to SNP-level analyses in detecting genetic association and functionality. First, since tests are being conducted at the gene level, PrediXcan has a lower multiple-testing burden compared to GWAS. Additionally, our understanding of functional pathways are more easily constructed for genes compared to SNPs. By using gene expression as an intermediate phenotype between genetic variation and complex phenotypes, PrediXcan results can help elucidate genetic mechanisms compared to GWAS. We completed our genetic association tests for schizophrenia in a cohort of 2,256 self-identified African American individuals from the genome-wide linkage scan of African American families (Suarez et al., 2006) and the GAIN (Manolio et al., 2007). For our study of bipolar disorder, we performed these association tests in 1,019 African American individuals from the GAIN. Using these data, we identified one gene significantly associated with schizophrenia and tested it for replication in the Psychiatric Genomics Consortium (PGC) GWAS of schizophrenia (Barbeira et al., 2018; Ripke et al., 2014; Sklar et al., 2011).

## METHODS

### Cohorts

The individuals in the cohorts used in this study were all self-identified African Americans. We acquired genotype and phenotype information for these individuals from the National Center for Biotechnology Information (NCBI) database of Genotypes and Phenotypes (dbGaP). The project was confirmed exempt from human subjects federal regulations under exemption number 4 by the Loyola University Chicago Institutional Review Board (project number 2014). Whole Genome genotypes and phenotypic information were acquired from three separate accessions in dbGaP (Table 1). All genotype information for these three accessions were acquired using Affymetrix Genome-Wide Human SNP Array 6.0, covering 934,940 SNPs. In total, our studies included 2,256 and 1,019 individuals for schizophrenia and bipolar disorder, respectively.

**Table 1. Cohort characteristics:** Three separate cohorts were integrated into two main cohorts characterized by phenotype. After merging the two schizophrenia cohorts using PLINK, the number of post-QC SNPs became identical.

| dbGaP Accession Number                                                              | phs000021.v3.p2 | phs000167.v1.p1 | phs000017.v3.p1  |
|-------------------------------------------------------------------------------------|-----------------|-----------------|------------------|
| <b>Phenotype</b>                                                                    | Schizophrenia   | Schizophrenia   | Bipolar Disorder |
| <b>Total Individuals</b>                                                            | 2,220           | 120             | 1,045            |
| <b>Cases</b>                                                                        | 1,241           | 15              | 359              |
| <b>Controls</b>                                                                     | 979             | 105             | 686              |
| <b>post-QC Individuals</b>                                                          | 2,256           | 2,256           | 1,019            |
| <b>pre-QC SNPs</b>                                                                  | 845,814         | 909,622         | 867,411          |
| <b>post-QC SNPs</b>                                                                 | 742,015         | 742,015         | 721,050          |
| <b>Post-Imputation SNPs (<math>r^2 &gt; 0.8</math>, MAF <math>&gt; 0.01</math>)</b> | 12,780,487      | 12,780,487      | 12,799,548       |

Case-control criteria for both phenotypes was determined using the DSM-IV (Diagnostic and Statistical

84 Manual of Mental Disorders) as described previously (Smith et al., 2009). Following the update from  
85 DSM-IV to DSM-V, 40 individuals, previously identified as cases under DSM-IV were removed from the  
86 study because they no longer met the case criteria for DSM-V.

### 87 **Quality Control and Imputation**

88 Following the download of data from dbGaP, we isolated genotypes and phenotypes of African Americans  
89 from those of European Americans or individuals of unidentified ethnicities for each cohort. We merged  
90 the PLINK binary files from the two schizophrenia studies. At this point 906,425 SNPs were genotyped  
91 in 2,256 individuals in the schizophrenia cohort and 867,411 SNPs and 1,019 individuals in the bipolar  
92 disorder cohort. While the schizophrenia cohort included individuals from GAIN and the genome-wide  
93 linkage scan of African American families (Suarez et al., 2006; Manolio et al., 2007), throughout the  
94 rest of the paper, we will refer to the combined cohort as GAIN. In each cohort, we removed SNPs with  
95 genotyping call rates less than 99% and those that significantly deviated from Hardy-Weinberg equilibrium  
96 ( $P < 1 \times 10^{-6}$ ). We then removed individuals with excess heterozygosity. Individuals greater than three  
97 standard deviations from mean heterozygosity were removed from the study. We used EIGENSOFT  
98 `smartpca` (Patterson et al., 2006) to generate the first ten principal components, which were used to  
99 confirm self-identified ancestry (Figs. S1 and S2). After this quality control (QC), we had 742,015 SNPs  
100 and 2,256 individuals total in the schizophrenia cohort and 721,050 SNPs and 1,019 individuals in the  
101 bipolar disorder cohort (Purcell et al., 2007).

102 From here, the filtered data from each cohort were uploaded to the University of Michigan Imputation  
103 Server for genotype imputation (Das et al., 2016). The genotypes for each cohort were imputed using  
104 Eagle version 2.3 for phasing and 1000 Genomes Phase 3 version 5 (1000G) as our reference panel (Gibbs  
105 et al., 2015). After this, we downloaded the imputed data from the Michigan Imputation Server and  
106 converted it to PLINK binary format. We then filtered the data by removing SNPs with imputation  $r^2 < 0.8$   
107 and minor allele frequency (MAF)  $< 0.01$ . At this point, we were left with 12,780,487 and 12,799,548  
108 SNPs in the schizophrenia and bipolar disorder cohorts, respectively. We explored Consortium on Asthma  
109 among African-ancestry Populations in the Americas (CAAPA) as an alternative reference panel for  
110 imputation, but 1000G imputed more SNPs meeting our filters while simultaneously imputing SNPs with  
111 MAFs identical to those imputed from CAAPA at our chosen imputation  $r^2$  and MAF thresholds (Fig.  
112 S3) (Mathias et al., 2016).

### 113 **Genome-Wide Association Study**

114 Using PLINK, we performed a logistic regression of the phenotype using the first ten genotypic principal  
115 components as covariates to account for population structure. We used a significance threshold of  $P$   
116  $< 5 \times 10^{-8}$  to identify significantly associated SNPs. Plots were generated from PLINK results using the  
117 web-based tool LocusZoom (Pruim et al., 2011).

### 118 **PrediXcan**

119 We performed the gene-based association test PrediXcan on both phenotypes, schizophrenia and bipolar  
120 disorder, in this study. PrediXcan functions by predicting an individual's genetically regulated gene  
121 expression levels using tissue-dependent prediction models trained using reference transcriptome data  
122 (Gamazon et al., 2015). For our experiments we tested each phenotype across 55 prediction models. 48 of  
123 these models were trained on 48 tissues in GTEx version 7 (Barbeira et al., 2018). Six of these models  
124 were generated from monocyte transcriptomes of individuals in the Multi-Ethnic Study of Atheroscle-  
125 rosis (MESA) cohort. The MESA models, the most diverse set of published predictors to date, were  
126 built from genotypes and transcriptomes of self-identified African American, Hispanic, and European  
127 individuals (Mogil et al., 2018). These models can be found at <http://predictdb.org/>. We also  
128 used a model built from dorsolateral prefrontal cortex (DLPFC) data from the CommonMind Consortium  
129 (Huckins et al., 2019). To impute the gene expression levels, the PLINK binary files from each cohort  
130 had to be converted to PrediXcan dosage files. To do this, we used the conversion script provided at  
131 <https://github.com/hakyimlab/PrediXcan/tree/master/Software>. After predict-  
132 ing a genetically regulated level of expression, we tested each expression level for association with the  
133 phenotype of interest. Since PrediXcan does not have a flag for performing a logistic regression with  
134 covariates, we performed a logistic regression of the phenotype with the first ten principal components to  
135 generate a residual phenotype in order to account for population structure. We then performed a linear  
136 regression with the residual phenotype and gene expression level for each gene.

137 Following the PrediXcan association tests, we adjusted for multiple testing using the adaptive shrinkage  
138 approach implemented in the R package *ashr* (Stephens, 2017). Using this package, we calculated the  
139 local false sign rate (lfsr) for each test, which is similar to traditional false discovery rate approaches,  
140 but takes into account both the effect sizes and standard errors of each gene-tissue pair ( $n=248,605$ ).  
141 In addition, this empirical Bayes approach uses the assumption that the distribution of actual effects is  
142 unimodal with the mode at 0. We set our significance threshold for gene-tissue pairs at  $\text{lfsr} < 0.2$ .

143 Due to the dearth of African American neuropsychiatric cohorts, replication could not be completed  
144 in an independent African American cohort. To validate our results, we compared our findings to the  
145 association results of a meta-analysis of the PGC GWAS summary statistics completed using S-PrediXcan  
146 (Barbeira et al., 2018; Ripke et al., 2014; Sklar et al., 2011). We performed S-PrediXcan in both  
147 phenotypes using predictors from GTEx. The 2014 Ripke et al. study originally included 36,989 cases  
148 and 113,075 controls composed of about 96.5% European and 3.5% Asian individuals. The 2011 Sklar et  
149 al. study included 7,481 cases and 9,250 controls of primarily European and Asian descent.

### 150 **MultiXcan**

151 Following imputation of gene expression levels, we performed MultiXcan (Barbeira et al., 2019), a gene-  
152 based association test that combines information across multiple tissues while taking their correlation into  
153 account. Using the predicted expression levels in 48 tissues across GTEx, we performed MultiXcan on  
154 both of the disease phenotypes.

## 155 **RESULTS**

### 156 **Schizophrenia Gene-based Association Study**

157 To better understand the genetic architecture of schizophrenia in African Americans, we performed  
158 transcriptome-wide association studies using prediction models built in 55 tissues. In the GAIN cohort of  
159 2,256 individuals (969 controls and 1287 cases), we predicted gene expression across 48 tissues in GTEx,  
160 six models built from monocytes across MESA, and DLPFC from CommonMind (Barbeira et al., 2018;  
161 Wheeler et al., 2016; Mogil et al., 2018; Huckins et al., 2019).

162 *PRMT7* was the most significantly associated gene with an lfsr of 0.119 and a p-value of  $5.49 \times 10^{-6}$   
163 in the atrial appendage of the heart (Table 2, Figs. 1 and 2). Increased predicted expression of *PRMT7*  
164 associated with schizophrenia in 32 of 33 tissues in GTEx tested (Figs. 2 and 3). Effect sizes were  
165 also positive for *PRMT7* associations with schizophrenia in 42 of 42 tissues tested in our S-PrediXcan  
166 application to the PGC data (Ripke et al., 2014) (Fig. 3). Of the 42 tissues tested, 30 associations were  
167 statistically significant ( $P < 0.0012$ ) after Bonferroni adjustment for the number of tissues tested and all  
168 42 tissues had  $P < 0.05$  (Table S1). We found no significant gene-tissue associations using the MESA or  
169 DLPFC models. While *PRMT7* in atrial appendage had the lowest lfsr across all models, *RP11-646C24.5*  
170 had a lower p-value (Fig. 1), but high lfsr in both pancreas (lfsr = 0.860) and sigmoid colon (lfsr = 0.851).  
171 Notably, the standard error in both of these tissues was over twice the size of that of *PRMT7*. Unlike more  
172 traditional false discovery rate approaches such as Benjamini-Hochberg, both effect size and standard error  
173 are used in an empirical Bayesian framework to calculate lfsr and thus the gene with the lowest p-value  
174 may not be the gene with the lowest lfsr (Stephens, 2017). We found no significant associations with the  
175 MultiXcan, cross-tissue model.

### 176 **Bipolar Disorder Gene-Based Association Study**

177 To develop a better understanding of the genetic mechanisms governing bipolar disorder in African  
178 Americans, we performed PrediXcan in a cohort of 1,019 individuals (671 controls and 348 Cases).  
179 Similar to our gene-based association study of schizophrenia, we performed our tests across the same 55  
180 gene expression prediction models in our bipolar disorder study.

181 In the GAIN cohort of 1,019 African American individuals, no genes were identified to be significantly  
182 associated with bipolar disorder. Increased predicted expression of *GREM2* in testis was the most  
183 associated ( $P = 2.20 \times 10^{-5}$ ) gene-tissue pair with bipolar disorder (Fig. 4). *KCNMB3* had the lowest lfsr  
184 at 0.919. We also found no significant associations with the MultiXcan, cross-tissue model.

### 185 **Schizophrenia SNP-level Association Test**

186 We performed a GWAS across greater than 12 million SNPs following imputation to help elucidate the  
187 role specific SNPs play in the genetics of schizophrenia in African Americans. We used the first ten

**Table 2. Top PrediXcan results for schizophrenia in African Americans (GAIN cohort) by local false sign rate (lfsr).** *PRMT7* makes up five of the top eight associated gene-tissue pairs by lfsr. BP are reported as transcription start site for the respective genes.

| Gene            | Beta | t    | p                     | se(beta) | Tissue (Predictor)                | lfsr  | CHR | BP        |
|-----------------|------|------|-----------------------|----------|-----------------------------------|-------|-----|-----------|
| <i>PRMT7</i>    | 0.10 | 4.56 | $5.49 \times 10^{-6}$ | 0.022    | Heart_Atrial_Appendage            | 0.119 | 16  | 68392457  |
| <i>PRMT7</i>    | 0.09 | 4.22 | $2.50 \times 10^{-5}$ | 0.020    | Cells_Transformed_fibroblasts     | 0.225 | 16  | 68392457  |
| <i>PRMT7</i>    | 0.08 | 4.00 | $6.63 \times 10^{-5}$ | 0.019    | Heart_Left_Ventricle              | 0.353 | 16  | 68392457  |
| <i>PRMT7</i>    | 0.11 | 4.23 | $2.47 \times 10^{-5}$ | 0.025    | Adrenal_Gland                     | 0.365 | 16  | 68392457  |
| <i>TBC1D2</i>   | 0.12 | 4.24 | $2.34 \times 10^{-5}$ | 0.028    | Brain_Putamen_basal_ganglia       | 0.468 | 9   | 100961311 |
| <i>NPC1</i>     | 0.07 | 3.83 | $1.29 \times 10^{-4}$ | 0.019    | Thyroid                           | 0.484 | 18  | 21086148  |
| <i>EIF2S2P3</i> | 0.08 | 3.81 | $1.41 \times 10^{-4}$ | 0.022    | Brain_Amygdala                    | 0.558 | 10  | 94428502  |
| <i>PRMT7</i>    | 0.08 | 3.73 | $1.97 \times 10^{-4}$ | 0.020    | Cells_EBV-transformed_lymphocytes | 0.578 | 16  | 68392457  |

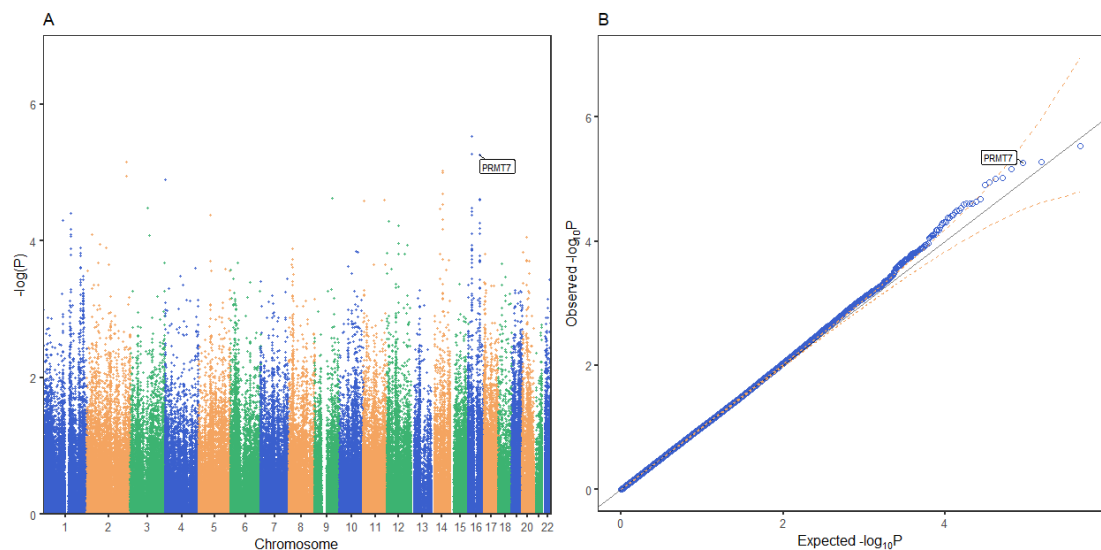

**Figure 1. PrediXcan association results for schizophrenia in GAIN African Americans.** Each point on the Manhattan (A) and Quantile-Quantile (B) plots represents one gene-tissue test for association with schizophrenia using GTEx version 7 gene expression prediction models. *PRMT7* expression in atrial appendage of the heart is labeled in both plots since it had the lowest lfsr (local false sign rate) of all tissues (lfsr = 0.119). Predicted *RP11-646C24.5* expression in pancreas and sigmoid colon associations are represented as the two points with lower p-values than *PRMT7*, respectively, but lfsr was greater than 0.8 for each association. Unlike more traditional false discovery rate approaches such as Benjamini-Hochberg, the gene with the lowest p-value may not be the gene with the lowest lfsr especially if the standard error of the effect size estimate is high (Stephens, 2017).

188 principal components as covariates for our logistic regression in order to adjust for population stratification  
 189 in the cohort. In our SNP-level GWAS, we found no significantly associated SNPs; however, one of the  
 190 most associated SNPs, rs8063446 ( $P = 2.66 \times 10^{-6}$ ), is located at the *PRMT7* locus (Fig. 5) While not  
 191 genome-wide significant, the most associated SNP in our study was rs112845369 ( $P = 1.094 \times 10^{-6}$ ) on  
 192 chromosome 15.

### 193 Bipolar Disorder SNP-level Association Test

194 We also performed a logistic GWAS in over 12 million SNPs in an attempt to understand the role specific  
 195 SNPs play in the genetics of bipolar disorder. We similarly used the first ten principal components  
 196 to adjust for population stratification in the bipolar disorder cohort. Similar to our findings in our  
 197 schizophrenia GWAS, we identified no SNPs significantly associated with bipolar disorder after adjusting  
 198 for multiple tests. rs10168049 on chromosome 2 was the most associated SNP ( $P=1.04 \times 10^{-6}$ ). While

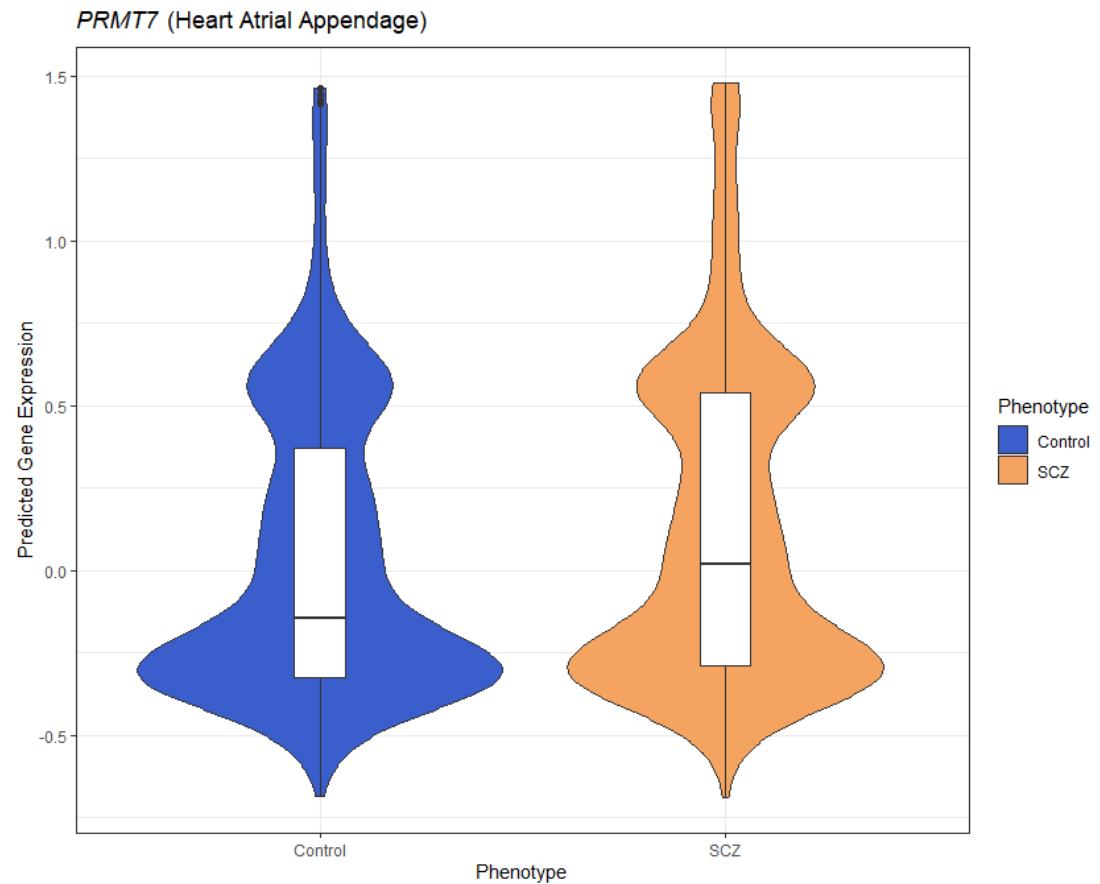

**Figure 2. Predicted *PRMT7* expression is higher in schizophrenia cases than controls in GAIN.** The violin plot represents the differences in density of predicted gene expression levels of *PRMT7* between cases (SCZ) and controls in heart atrial appendage from GTEx ( $P = 5.49 \times 10^{-6}$ ).

199 not significantly associated with bipolar disorder, rs10168049 has a minor allele frequency of 0.465 in  
200 African 1000G populations compared to those of European and East Asian populations with minor allele  
201 frequencies of 0.042 and 0.097, respectively (Fig. 6) (Sherry, 2001; Gibbs et al., 2015). All PrediXcan and  
202 GWAS summary statistics for both diseases are available at [https://github.com/WheelerLab/](https://github.com/WheelerLab/Neuropsychiatric-Phenotypes)  
203 Neuropsychiatric-Phenotypes.

## 204 DISCUSSION

205 We performed gene-level (PrediXcan) and SNP-level association studies for schizophrenia and bipolar  
206 disorder in African Americans from GAIN (Suarez et al., 2006; Manolio et al., 2007). We used summary  
207 statistics from the predominantly European PGC to replicate our findings (Ripke et al., 2014; Sklar et al.,  
208 2011).

### 209 A potential role for *PRMT7* in schizophrenia

210 *PRMT7* was significantly associated with schizophrenia in our PrediXcan analyses and one of the most  
211 associated SNPs in our GWAS is just upstream of the gene (Figs. 1 and 5). Schizophrenia was associated  
212 with increased expression of *PRMT7* in 32 of 33 tissues in which it was predicted in the GAIN cohort.  
213 When S-PrediXcan was applied to the PGC summary stats, increased expression of *PRMT7* was associated  
214 with schizophrenia in all 42 tissues in which expression was predicted (Fig. 3). *PRMT7* made up five  
215 of the eight most associated gene-tissue pairs (Table 2). *PRMT7* has previously been associated with  
216 SBIDD syndrome, an intellectual disability syndrome (Agolini et al., 2018). Its function in the disorder  
217 remains unclear, but *PRMT7* has a functional role in neuronal differentiation, which could be a potential

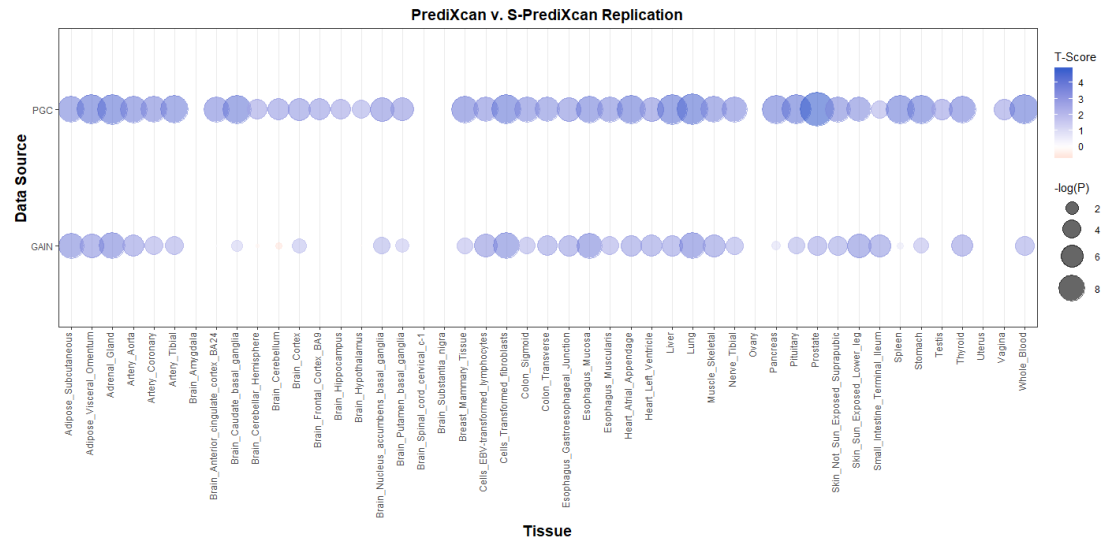

**Figure 3. *PRMT7* PrediXcan discovery (GAIN) and replication (PGC) results across tissue models.** In each bubble plot, the radius of the bubble is representative of the significance of *PRMT7* association with SCZ. The color of the bubble represents the test statistic with blue representing a positive direction of effect and red representing a negative direction of effect.

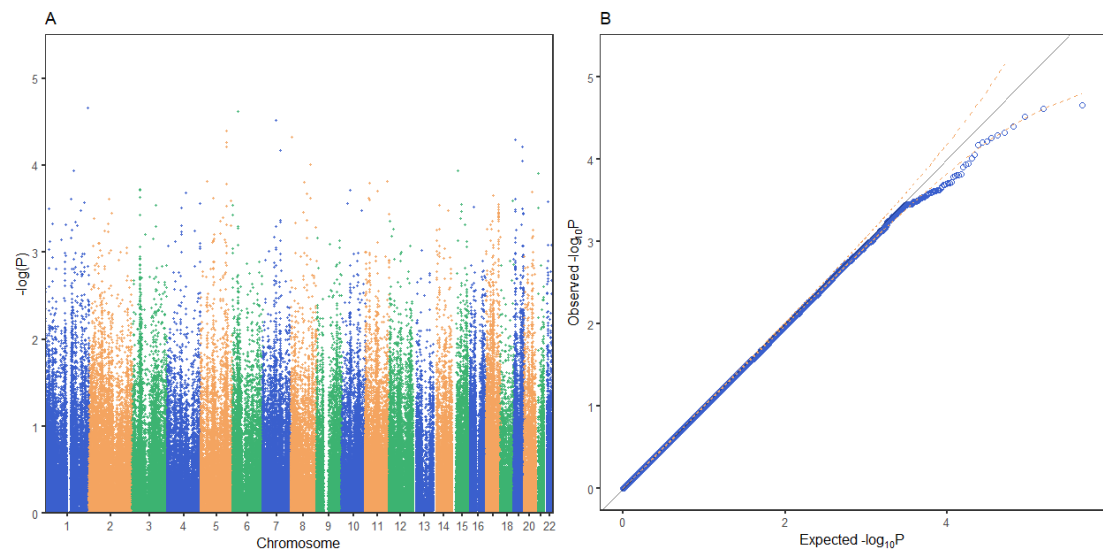

**Figure 4. PrediXcan association results for bipolar disorder in GAIN.** Each point on the Manhattan (A) and Quantile-Quantile (B) plots represents a gene-tissue association test for our study of bipolar disorder using GTEx models. *GREM2* on chromosome 1 was the gene most associated with bipolar disorder in our study. All of the gene associations tests across 48 tissues in GTEx are plotted in (A) and (B). 95% confidence intervals depicted by gold dotted lines (B).

218 mechanism to explore further (Dhar et al., 2012).

219 While not found to be significantly associated with schizophrenia in brain tissues, the association  
220 of *PRMT7* in adrenal gland and other vascular system organs highlights the sharing of eQTLs across  
221 tissues. Recently, genes in both colon and adrenal gland were identified to be significantly associated with  
222 schizophrenia (Gamazon et al., 2019). Gamazon et al. highlight the opportunity to better understand the  
223 genetic mechanisms of neuropsychiatric diseases outside of the context of the central nervous system.  
224 A larger sample size would be needed to elucidate expression correlations and potential co-expression  
225 networks underlying African American neuropsychiatric traits.

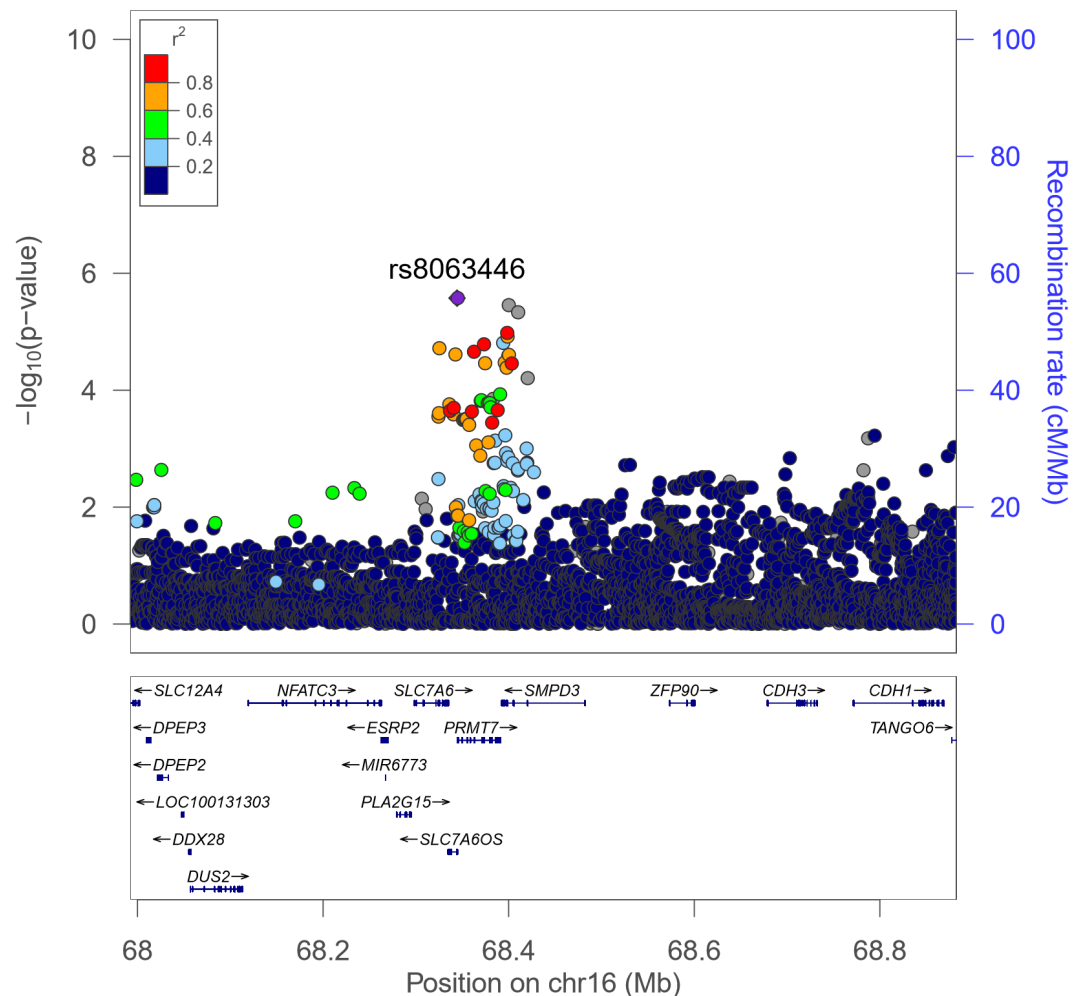

**Figure 5. LocusZoom plot of the *PRMT7* locus in the GAIN GWAS for schizophrenia.** rs8063446 is found in *SLC7A6OS* and 514 bp upstream of *PRMT7*. In our PrediXcan analyses, we found that increased predicted expression of *PRMT7* is associated with schizophrenia. rs8063446 is located in a linkage disequilibrium (LD) block with other SNPs associated with schizophrenia when plotted using 1000G AFR LD Population.

## 226 Growing need for diversity in GWAS and genetic prediction models

227 In our GWAS of bipolar disorder, rs10168049 was the most significantly associated SNP. This SNP has  
 228 not been implicated in previous studies, and its low minor allele frequency in European populations  
 229 suggests that it could have a larger functional impact in African populations (Fig. 6). In addition to not  
 230 being identified in any published GWAS, rs10168049 is not present in any of the 55 prediction models we  
 231 used to impute gene expression levels (MacArthur et al., 2017). As a result, this SNP did not contribute to  
 232 predicted expression levels in our gene-based association tests. The association of this SNP with bipolar  
 233 disorder needs to be replicated in larger studies; however, the lack of associations in other GWAS in the  
 234 GWAS Catalog (MacArthur et al., 2017) may also be a result of ascertainment bias due to the field's focus  
 235 on European populations (Lachance and Tishkoff, 2014).

236 Version 7 of the GTEx predictors we used contain data exclusively from individuals of European  
 237 descent. These models are not optimal for predicting expression in African American cohorts (Mogil  
 238 et al., 2018; Mikhaylova and Thornton, 2019). While they offer power driven by sample size, they do not  
 239 include models with African ancestry-specific alleles that might affect susceptibility to neuropsychiatric  
 240 traits in this population.

241 The use of prediction models from monocytes in MESA offers advantages with respect to similar



242 ancestry, but at the loss of nearly half of the sample size of many GTEx tissues. To ideally predict  
243 expression in African American cohorts, prediction models built in more tissues from African ancestry  
244 reference transcriptomes are needed. Moreover, future ancestry-specific models will not only increase  
245 accuracy of expression prediction, but they will also create opportunities for different methods, such as  
246 local ancestry mapping, to be applied to expression prediction by accounting for recent admixture within  
247 African American cohorts (Zhong et al., 2019).

## 248 CONCLUSION

249 Information from this study provides promising insight into the genetic architecture of gene expression  
250 underlying two neuropsychiatric disorders in African Americans. The results of our study were curbed by  
251 the small sample size of GAIN. With just over 2,100 individuals in our study of schizophrenia and 1,000  
252 individuals in our study bipolar disorder, our findings were limited in power compared to larger European  
253 studies nearly two orders of magnitude greater in size (Ripke et al., 2014; Stahl et al., 2019).

254 The size and diversity of our prediction models further hindered our ability to identify novel genes  
255 associated with these disorders. The MESA models, the most diverse of our predictors, were still limited  
256 in tissue type (monocytes only) and size at 233 African American individuals, 352 Hispanic individuals,  
257 and 578 European individuals (Mogil et al., 2018). The GTEx and CommonMind predictors we used,  
258 while generated from a larger sample size than the MESA African American cohort for many tissues,  
259 were made from exclusively European individuals (Aguet et al., 2017; Huckins et al., 2019). These  
260 key limitations highlight the need to increase the number of individuals from diverse populations in the  
261 study of neuropsychiatric genomics. To best characterize the molecular mechanisms that govern complex  
262 traits in diverse populations, diverse models, reference panels, and study subjects need to be included in  
263 genomics research.

chr2:122078406 G/A

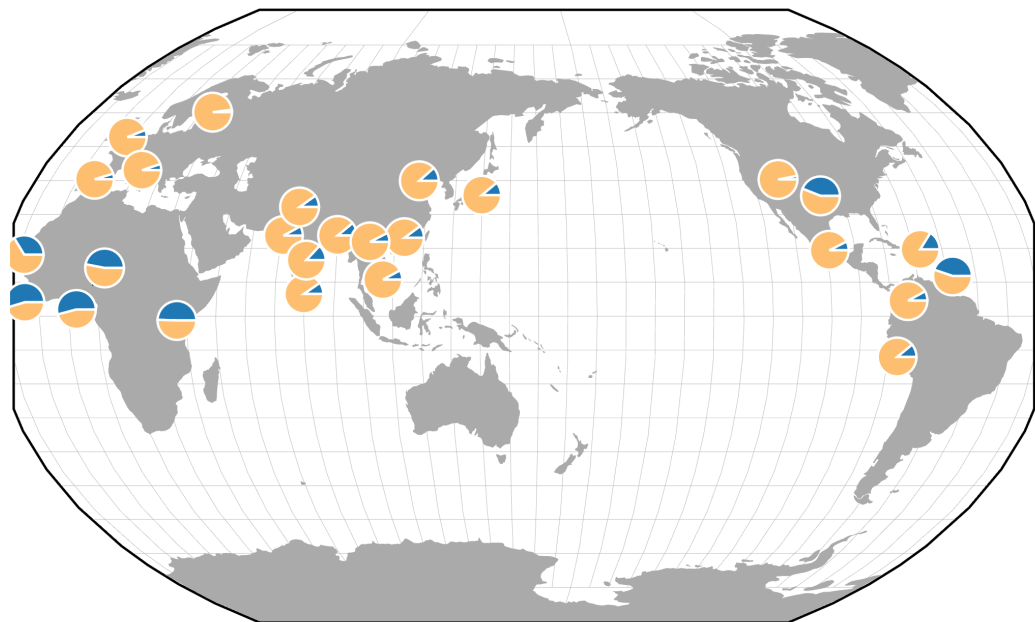

**Figure 6. rs10168049 frequency across 1000G populations.** Representative minor allele frequencies (MAFs) of rs10168049, which associated with bipolar disorder in GAIN ( $P=1.04 \times 10^{-6}$ ) in different populations from 1000G. The global MAF of this SNP in 1000G is 0.187; however, the MAF reaches up to 0.541 in the YRI (Yoruba people in Ibadan, Nigeria) population of 1000G. This figure was generated using the Geography of Genetic Variants Browser (Marcus and Novembre, 2017).

## 264 **DECLARATIONS**

### 265 **Conflicts of Interests**

266 The authors declare no conflicts of interest.

### 267 **Author Contributions**

268 Peter N. Fiorica conceived and designed the experiments, performed the experiments, analyzed results,  
269 contributed analysis tools, drafted the manuscript, prepared figures and/or tables, reviewed drafts of the  
270 manuscript.

271 Heather E. Wheeler conceived and designed the experiments, analyzed results, contributed analysis  
272 tools, drafted the manuscript, reviewed drafts of the manuscript.

### 273 **Funding**

274 This work is supported by the National Institutes of Health National Human Genome Research Institute  
275 Academic Research Enhancement Award R15 HG009569 (PI: Heather E. Wheeler) and the Loyola  
276 University Chicago Carbon Undergraduate Research Fellowship, and Mulcahy Scholarship (Peter N.  
277 Fiorica). The funders had no role in study design, data collection and analysis, decision to publish, or  
278 preparation of the manuscript.

### 279 **Data Availability**

280 All datasets analyzed were downloaded from the NCBI dbGaP at <https://www.ncbi.nlm.nih.gov/gap/> using the accession numbers phs000021.v3.p2, phs000167.v1.p1, and phs000017.v3.p1. Gene  
281 prediction models were downloaded from PredictDB at <http://predictdb.org/>. All scripts and  
282 summary statistics are available at  
283 <https://github.com/WheelerLab/Neuropsychiatric-Phenotypes>.

## 285 **ACKNOWLEDGEMENTS**

286 Funding support for the companion studies, Genome-Wide Association Study of Schizophrenia (GAIN)  
287 and Molecular Genetics of Schizophrenia - nonGAIN Sample (MGS\_nonGAIN), was provided by  
288 Genomics Research Branch at NIMH (see below) and the genotyping and analysis of samples was provided  
289 through the Genetic Association Information Network (GAIN) and under the MGS U01s: MH79469  
290 and MH79470. Assistance with data cleaning was provided by the National Center for Biotechnology  
291 Information. The MGS dataset(s) used for the analyses described in this manuscript were obtained from  
292 the database of Genotype and Phenotype (dbGaP) found at <http://www.ncbi.nlm.nih.gov/gap> through  
293 dbGaP accession numbers phs000021.v2.p1 (GAIN) and phs000167.v1.p1 (nonGAIN). Samples and  
294 associated phenotype data for the MGS GWAS study were collected under the following grants: NIMH  
295 Schizophrenia Genetics Initiative U01s: MH46276 (CR Cloninger), MH46289 (C Kaufmann), and  
296 MH46318 (MT Tsuang); and MGS Part 1 (MGS1) and Part 2 (MGS2) R01s: MH67257 (NG Buccola),  
297 MH59588 (BJ Mowry), MH59571 (PV Gejman), MH59565 (Robert Freedman), MH59587 (F Amin),  
298 MH60870 (WF Byerley), MH59566 (DW Black), MH59586 (JM Silverman), MH61675 (DF Levinson),  
299 and MH60879 (CR Cloninger). Further details of collection sites, individuals, and institutions may be  
300 found in data supplement Table 1 of Sanders et al. (2008; PMID: 18198266) and at the study dbGaP  
301 pages.

302 Funding support for the Whole Genome Association Study of Bipolar Disorder was provided by  
303 the National Institute of Mental Health (NIMH) and the genotyping of samples was provided through  
304 the Genetic Association Information Network (GAIN). The datasets used for the analyses described  
305 in this manuscript were obtained from the database of Genotypes and Phenotypes (dbGaP) found at  
306 <http://www.ncbi.nlm.nih.gov/gap> through dbGaP accession number XXXX. Samples and associated  
307 phenotype data for the Collaborative Genomic Study of Bipolar Disorder were provided by the The  
308 NIMH Genetics Initiative for Bipolar Disorder. Data and biomaterials were collected in four projects that  
309 participated in NIMH Bipolar Disorder Genetics Initiative. From 1991-98, the Principal Investigators  
310 and Co-Investigators were: Indiana University, Indianapolis, IN, U01 MH46282, John Nurnberger, M.D.,  
311 Ph.D., Marvin Miller, M.D., and Elizabeth Bowman, M.D.; Washington University, St. Louis, MO,  
312 U01 MH46280, Theodore Reich, M.D., Allison Goate, Ph.D., and John Rice, Ph.D.; Johns Hopkins  
313 University, Baltimore, MD U01 MH46274, J. Raymond DePaulo, Jr., M.D., Sylvia Simpson, M.D., MPH,

314 and Colin Stine, Ph.D.; NIMH Intramural Research Program, Clinical Neurogenetics Branch, Bethesda,  
315 MD, Elliot Gershon, M.D., Diane Kazuba, B.A., and Elizabeth Maxwell, M.S.W. Data and biomaterials  
316 were collected as part of ten projects that participated in the NIMH Bipolar Disorder Genetics Initiative.  
317 From 1999-03, the Principal Investigators and Co-Investigators were: Indiana University, Indianapolis,  
318 IN, R01 MH59545, John Nurnberger, M.D., Ph.D., Marvin J. Miller, M.D., Elizabeth S. Bowman, M.D.,  
319 N. Leela Rau, M.D., P. Ryan Moe, M.D., Nalini Samavedy, M.D., Rif El-Mallakh, M.D. (at University of  
320 Louisville), Hussein Manji, M.D. (at Wayne State University), Debra A. Glitz, M.D. (at Wayne State  
321 University), Eric T. Meyer, M.S., Carrie Smiley, R.N., Tatiana Foroud, Ph.D., Leah Flury, M.S., Danielle  
322 M. Dick, Ph.D., Howard Edenberg, Ph.D.; Washington University, St. Louis, MO, R01 MH059534,  
323 John Rice, Ph.D., Theodore Reich, M.D., Allison Goate, Ph.D., Laura Bierut, M.D. ; Johns Hopkins  
324 University, Baltimore, MD, R01 MH59533, Melvin McInnis M.D. , J. Raymond DePaulo, Jr., M.D.,  
325 Dean F. MacKinnon, M.D., Francis M. Mondimore, M.D., James B. Potash, M.D., Peter P. Zandi, Ph.D.,  
326 Dimitrios Avramopoulos, and Jennifer Payne; University of Pennsylvania, PA, R01 MH59553, Wade  
327 Berrettini M.D., Ph.D. ; University of California at Irvine, CA, R01 MH60068, William Byerley M.D.,  
328 and Mark Vawter M.D. ; University of Iowa, IA, R01 MH059548, William Coryell M.D. , and Raymond  
329 Crowe M.D. ; University of Chicago, IL, R01 MH59535, Elliot Gershon, M.D., Judith Badner Ph.D. ,  
330 Francis McMahon M.D. , Chunyu Liu Ph.D., Alan Sanders M.D., Maria Caserta, Steven Dinwiddie M.D.,  
331 Tu Nguyen, Donna Harakal; University of California at San Diego, CA, R01 MH59567, John Kelsoe,  
332 M.D., Rebecca McKinney, B.A.; Rush University, IL, R01 MH059556, William Scheftner M.D. , Howard  
333 M. Kravitz, D.O., M.P.H., Diana Marta, B.S., Annette Vaughn-Brown, MSN, RN, and Laurie Bederow,  
334 MA; NIMH Intramural Research Program, Bethesda, MD, 1Z01MH002810-01, Francis J. McMahon,  
335 M.D., Layla Kassem, PsyD, Sevilla Detera-Wadleigh, Ph.D, Lisa Austin, Ph.D, Dennis L. Murphy, M.D.

## 336 SUPPLEMENTAL TABLES & FIGURES

337 **Supplemental Figure 1: Principal Component Analysis of Schizophrenia Genotype Data** We per-  
338 formed principal component analysis on the GAIN cohort merged with three populations from version  
339 three of the HapMap Project (Belmont et al., 2003). Each point on the plot represents one individual in the  
340 study plotted across axes for their first and second principal components. The three HapMap populations  
341 plotted are Chinese in Beijing and Japanese in Tokyo (ASN), European ancestry in Utah (CEU), and  
342 Yoruba people in Ibadan, Nigeria (YRI).

343 **Supplemental Figure 2: Principal Component Analysis of Bipolar Disorder Genotype Data** We  
344 performed principal component analysis on the GAIN cohort merged with three populations from version  
345 three of the HapMap Project (Belmont et al., 2003). Each point on the plot represents one individual in the  
346 study plotted across axes for their first and second principal components. The three HapMap populations  
347 plotted are Chinese in Beijing and Japanese in Tokyo (ASN), European ancestry in Utah (CEU), and  
348 Yoruba people in Ibadan, Nigeria (YRI).

349 **Supplemental Figure 3: Comparison of MAFs across Imputation Reference Panels** We imputed  
350 genotypes using the University of Michigan Imputation Server using either 1000G or CAAPA as the  
351 reference panel. (A-D) depict the MAFs of SNPs from the GAIN schizophrenia study. We saw a similar  
352 pattern of MAFs in the GAIN data of the bipolar disorder study. (A) depicts the MAF of SNPs at the  
353 intersection of each reference panel before filtering by  $r^2 > 0.8$  and  $MAF > 0.01$ . (B) Depicts MAFs  
354 of SNPs in 1000G and CAAPA from (A) that passed the filters of  $r^2 > 0.8$  and  $MAF > 0.01$  and were  
355 included in the GTEx prediction models across 44 tissues. (C) shows a plot of the MAFs of filtered SNPs  
356 from 1000G and CAAPA found in the MESA predictors. (D) shows a plot of the MAFs of filtered SNPs  
357 from 1000G and CAAPA that were included in our GWAS.

358 **Supplemental Table 1: S-PrediXcan Results of PGC SCZ Data for PRMT7** The table includes  
359 the results for PRMT7 in our S-PrediXcan application to the PGC GWAS summary statistics across 42  
360 tissues in which gene expression was predicted.

## 361 REFERENCES

362 Agolini, E., Dentici, M. L., Bellacchio, E., Alesi, V., Radio, F. C., Torella, A., Musacchia, F., Tartaglia, M.,  
363 Dallapiccola, B., Nigro, V., Digilio, M. C., and Novelli, A. (2018). Expanding the clinical and molecular  
364 spectrum of PRMT7 mutations: 3 additional patients and review. *Clinical Genetics*, 93(3):675–681.

- 365 Aguet, F., Brown, A. A., Castel, S. E., Davis, J. R., He, Y., Jo, B., Mohammadi, P., Park, Y. S., Parsana,  
366 P., Segrè, A. V., Strober, B. J., Zappala, Z., Cummings, B. B., Gelfand, E. T., Hadley, K., Huang,  
367 K. H., Lek, M., Li, X., Nedzel, J. L., Nguyen, D. Y., Noble, M. S., Sullivan, T. J., Tukiainen, T.,  
368 MacArthur, D. G., Getz, G., Addington, A., Guan, P., Koester, S., Little, A. R., Lockhart, N. C., Moore,  
369 H. M., Rao, A., Struewing, J. P., Volpi, S., Brigham, L. E., Hasz, R., Hunter, M., Johns, C., Johnson,  
370 M., Kopen, G., Leinweber, W. F., Lonsdale, J. T., McDonald, A., Mestichelli, B., Myer, K., Roe, B.,  
371 Salvatore, M., Shad, S., Thomas, J. A., Walters, G., Washington, M., Wheeler, J., Bridge, J., Foster,  
372 B. A., Gillard, B. M., Karasik, E., Kumar, R., Miklos, M., Moser, M. T., Jewell, S. D., Montroy, R. G.,  
373 Rohrer, D. C., Valley, D., Mash, D. C., Davis, D. A., Sobin, L., Barcus, M. E., Branton, P. A., Abell,  
374 N. S., Balliu, B., Delaneau, O., Frésard, L., Gamazon, E. R., Garrido-Martín, D., Gewirtz, A. D., Gliner,  
375 G., Gloudemans, M. J., Han, B., He, A. Z., Hormozdiari, F., Li, X., Liu, B., Kang, E. Y., McDowell,  
376 I. C., Ongen, H., Palowitch, J. J., Peterson, C. B., Quon, G., Ripke, S., Saha, A., Shabalín, A. A.,  
377 Shimko, T. C., Sul, J. H., Teran, N. A., Tsang, E. K., Zhang, H., Zhou, Y. H., Bustamante, C. D., Cox,  
378 N. J., Guigó, R., Kellis, M., McCarthy, M. I., Conrad, D. F., Eskin, E., Li, G., Nobel, A. B., Sabatti,  
379 C., Stranger, B. E., Wen, X., Wright, F. A., Ardlie, G. F., Dermitzakis, E. T., Lappalainen, T., Battle,  
380 A., Brown, C. D., Engelhardt, B. E., Montgomery, S. B., Handsaker, R. E., Kashin, S., Karczewski,  
381 K. J., Nguyen, D. T., Trowbridge, C. A., Barshir, R., Basha, O., Bogu, G. K., Chen, L. S., Chiang,  
382 C., Damani, F. N., Ferreira, P. G., Hall, I. M., Howald, C., Im, H. K., Kim, Y., Kim-Hellmuth, S.,  
383 Mangul, S., Monlong, J., Muñoz-Aguirre, M., Ndungu, A. W., Nicolae, D. L., Oliva, M., Panousis, N.,  
384 Papasaikas, P., Payne, A. J., Quan, J., Reverter, F., Sammeth, M., Scott, A. J., Sodaei, R., Stephens, M.,  
385 Urbut, S., Van De Bunt, M., Wang, G., Xi, H. S., Yeger-Lotem, E., Zaugg, J. B., Akey, J. M., Bates,  
386 D., Chan, J., Claussnitzer, M., Demanelis, K., Diegel, M., Doherty, J. A., Feinberg, A. P., Fernando,  
387 M. S., Halow, J., Hansen, K. D., Haugen, E., Hickey, P. F., Hou, L., Jasmine, F., Jian, R., Jiang, L.,  
388 Johnson, A., Kaul, R., Kibriya, M. G., Lee, K., Li, J. B., Li, Q., Lin, J., Lin, S., Linder, S., Linke,  
389 C., Liu, Y., Maurano, M. T., Molinie, B., Nelson, J., Neri, F. J., Park, Y., Pierce, B. L., Rinaldi, N. J.,  
390 Rizzardì, L. F., Sandstrom, R., Skol, A., Smith, K. S., Snyder, M. P., Stamatoyannopoulos, J., Tang, H.,  
391 Wang, L., Wang, M., Van Wittenberghe, N., Wu, F., Zhang, R., Nierras, C. R., Carithers, L. J., Vaught,  
392 J. B., Gould, S. E., Lockart, N. C., Martin, C., Addington, A. M., Koester, S. E., Undale, A. H., Smith,  
393 A. M., Tabor, D. E., Roche, N. V., McLean, J. A., Vatanian, N., Robinson, K. L., Valentino, K. M., Qi,  
394 L., Hunter, S., Hariharan, P., Singh, S., Um, K. S., Matose, T., Tomaszewski, M. M., Barker, L. K.,  
395 Mosavel, M., Siminoff, L. A., Traino, H. M., Flicek, P., Juettemann, T., Ruffier, M., Sheppard, D.,  
396 Taylor, K., Trevanion, S. J., Zerbino, D. R., Craft, B., Goldman, M., Haeussler, M., Kent, W. J., Lee,  
397 C. M., Paten, B., Rosenbloom, K. R., Vivian, J., and Zhu, J. (2017). Genetic effects on gene expression  
398 across human tissues. *Nature*, 550(7675):204–213.
- 399 Allardyce, J., Leonenko, G., Hamshere, M., Pardiñas, A. F., Forty, L., Knott, S., Gordon-Smith, K.,  
400 Porteous, D. J., Haywood, C., Di Florio, A., Jones, L., McIntosh, A. M., Owen, M. J., Holmans, P.,  
401 Walters, J. T., Craddock, N., Jones, I., O'Donovan, M. C., and Escott-Price, V. (2018). Association  
402 between schizophrenia-related polygenic liability and the occurrence and level of mood-incongruent  
403 psychotic symptoms in bipolar disorder. *JAMA Psychiatry*, 75(1):28–35.
- 404 Barbeira, A. N., Dickinson, S. P., Bonazzola, R., Zheng, J., Wheeler, H. E., Torres, J. M., Torstenson,  
405 E. S., Shah, K. P., Garcia, T., Edwards, T. L., Stahl, E. A., Huckins, L. M., Consortium, G., Nicolae,  
406 D. L., Cox, N. J., and Im, H. K. (2018). Exploring the phenotypic consequences of tissue specific gene  
407 expression variation inferred from GWAS summary statistics. *Nature Communications*, 9(1825):1–20.
- 408 Barbeira, A. N., Pividori, M. D., Zheng, J., Wheeler, H. E., and Nicolae, D. L. (2019). Integrating  
409 Predicted Transcriptome From Multiple Tissues Improves Association Detection. *PLoS Genetics*, pages  
410 1–28.
- 411 Belmont, J. W., Hardenbol, P., Willis, T. D., Yu, F., Yang, H., Ch'Ang, L. Y., Huang, W., Liu, B., Shen,  
412 Y., Tam, P. K. H., Tsui, L. C., Waye, M. M. Y., Wong, J. T. F., Zeng, C., Zhang, Q., Chee, M. S.,  
413 Galver, L. M., Kruglyak, S., Murray, S. S., Oliphant, A. R., Montpetit, A., Chagnon, F., Ferretti, V.,  
414 Leboeuf, M., Phillips, M. S., Verner, A., Duan, S., Lind, D. L., Miller, R. D., Rice, J., Saccone, N. L.,  
415 Taillon-Miller, P., Xiao, M., Sekine, A., Sorimachi, K., Tanaka, Y., Tsunoda, T., Yoshino, E., Bentley,  
416 D. R., Hunt, S., Powell, D., Zhang, H., Matsuda, I., Fukushima, Y., Macer, D. R., Suda, E., Rotimi,  
417 C., Adebamowo, C. A., Aniagwu, T., Marshall, P. A., Matthew, O., Nkwodimmah, C., Royal, C. D.,  
418 Leppert, M. F., Dixon, M., Cunningham, F., Kanani, A., Thorisson, G. A., Chen, P. E., Cutler, D. J.,  
419 Kashuk, C. S., Donnelly, P., Marchini, J., McVean, G. A., Myers, S. R., Cardon, L. R., Morris, A., Weir,

- 420 B. S., Mullikin, J. C., Feolo, M., Daly, M. J., Qiu, R., Kent, A., Dunston, G. M., Kato, K., Niikawa,  
421 N., Watkin, J., Gibbs, R. A., Sodergren, E., Weinstock, G. M., Wilson, R. K., Fulton, L. L., Rogers,  
422 J., Birren, B. W., Han, H., Wang, H., Godbout, M., Wallenburg, J. C., L'Archevêque, P., Bellemare,  
423 G., Todani, K., Fujita, T., Tanaka, S., Holden, A. L., Collins, F. S., Brooks, L. D., McEwen, J. E.,  
424 Guyer, M. S., Jordan, E., Peterson, J. L., Spiegel, J., Sung, L. M., Zacharia, L. F., Kennedy, K., Dunn,  
425 M. G., Seabrook, R., Shillito, M., Skene, B., Stewart, J. G., Valle, D. L., Clayton, E. W., Jorde, L. B.,  
426 Chakravarti, A., Cho, M. K., Duster, T., Foster, M. W., Jasperse, M., Knoppers, B. M., Kwok, P. Y.,  
427 Licinio, J., Long, J. C., Ossorio, P., Wang, V. O., Rotimi, C. N., Spallone, P., Terry, S. F., Lander, E. S.,  
428 Lai, E. H., Nickerson, D. A., Abecasis, G. R., Altshuler, D., Boehnke, M., Deloukas, P., Douglas, J. A.,  
429 Gabriel, S. B., Hudson, R. R., Hudson, T. J., Kruglyak, L., Nakamura, Y., Nussbaum, R. L., Schaffner,  
430 S. F., Sherry, S. T., Stein, L. D., and Tanaka, T. (2003). The international HapMap project. *Nature*,  
431 426(6968):789–796.
- 432 Bhalala, O. G., Nath, A. P., Inouye, M., and Sibley, C. R. (2018). Identification of expression quantitative  
433 trait loci associated with schizophrenia and affective disorders in normal brain tissue. *PLoS Genetics*,  
434 14(8):1–25.
- 435 Consortium, I. S. (2009). Common polygenic variation contributes to risk of schizophrenia that overlaps  
436 with bipolar disease. *Nature*, 460(7256):748–752.
- 437 Das, S., Forer, L., Schönherr, S., Sidore, C., Locke, A. E., Kwong, A., Vrieze, S. I., Chew, E. Y., Levy,  
438 S., McGue, M., Schlessinger, D., Stambolian, D., Loh, P.-R., Iacono, W. G., Swaroop, A., Scott, L. J.,  
439 Cucca, F., Kronenberg, F., Boehnke, M., Abecasis, G. R., and Fuchsberger, C. (2016). Next-generation  
440 genotype imputation service and methods. *Nature genetics*, 48(10):1284–1287.
- 441 De Candia, T. R., Lee, S. H., Yang, J., Browning, B. L., Gejman, P. V., Levinson, D. F., Mowry, B. J.,  
442 Hewitt, J. K., Goddard, M. E., O'Donovan, M. C., Purcell, S. M., Posthuma, D., Visscher, P. M.,  
443 Wray, N. R., and Keller, M. C. (2013). Additive genetic variation in schizophrenia risk is shared by  
444 populations of African and European descent. *American Journal of Human Genetics*, 93(3):463–470.
- 445 Dhar, S. S., Lee, S. H., Kan, P. Y., Voigt, P., Ma, L., Shi, X., Reinberg, D., and Lee, M. G. (2012).  
446 Trans-tail regulation of MLL4-catalyzed H3K4 methylation by H4R3 symmetric dimethylation is  
447 mediated by a tandem PHD of MLL4. *Genes and Development*, 26(24):2749–2762.
- 448 Gamazon, E. R., Wheeler, H. E., Shah, K. P., Mozaffari, S. V., Aquino-Michaels, K., Carroll, R. J., Eyler,  
449 A. E., Denny, J. C., Nicolae, D. L., Cox, N. J., and Im, H. K. (2015). A gene-based association method  
450 for mapping traits using reference transcriptome data. *Nature Genetics*.
- 451 Gamazon, E. R., Zwinderman, A. H., Cox, N. J., Denys, D., and Derks, E. M. (2019). Multi-tissue tran-  
452 scriptome analyses identify genetic mechanisms underlying neuropsychiatric traits. *Nature Genetics*.
- 453 Gibbs, R. A., Boerwinkle, E., Doddapaneni, H., Han, Y., Korchina, V., Kovar, C., Lee, S., Muzny, D.,  
454 Reid, J. G., Zhu, Y., Wang, J., Chang, Y., Feng, Q., Fang, X., Guo, X., Jian, M., Jiang, H., Jin, X.,  
455 Lan, T., Li, G., Li, J., Li, Y., Liu, S., Liu, X., Lu, Y., Ma, X., Tang, M., Wang, B., Wang, G., Wu,  
456 H., Wu, R., Xu, X., Yin, Y., Zhang, D., Zhang, W., Zhao, J., Zhao, M., Zheng, X., Lander, E. S.,  
457 Altshuler, D. M., Gabriel, S. B., Gupta, N., Gharani, N., Toji, L. H., Gerry, N. P., Resch, A. M., Flicek,  
458 P., Barker, J., Clarke, L., Gil, L., Hunt, S. E., Kelman, G., Kulesha, E., Leinonen, R., McLaren, W. M.,  
459 Radhakrishnan, R., Roa, A., Smirnov, D., Smith, R. E., Streeter, I., Thormann, A., Toneva, I., Vaughan,  
460 B., Zheng-Bradley, X., Bentley, D. R., Grocock, R., Humphray, S., James, T., Kingsbury, Z., Lehrach,  
461 H., Sudbrak, R., Albrecht, M. W., Amstislavskiy, V. S., Borodina, T. A., Lienhard, M., Mertes, F.,  
462 Sultan, M., Timmermann, B., Yaspo, M.-L., Mardis, E. R., Wilson, R. K., Fulton, L., Fulton, R., Sherry,  
463 S. T., Ananiev, V., Belaia, Z., Beloslyudtsev, D., Bouk, N., Chen, C., Church, D., Cohen, R., Cook, C.,  
464 Garner, J., Hefferon, T., Kimelman, M., Liu, C., Lopez, J., Meric, P., O'Sullivan, C., Ostapchuk, Y.,  
465 Phan, L., Ponomarov, S., Schneider, V., Shekhtman, E., Sirotkin, K., Slotta, D., Zhang, H., McVean,  
466 G. A., Durbin, R. M., Balasubramaniam, S., Burton, J., Danecek, P., Keane, T. M., Kolb-Kococinski,  
467 A., McCarthy, S., Stalker, J., Quail, M., Schmidt, J. P., Davies, C. J., Gollub, J., Webster, T., Wong,  
468 B., Zhan, Y., Auton, A., Campbell, C. L., Kong, Y., Marcketta, A., Gibbs, R. A., Yu, F., Antunes, L.,  
469 Bainbridge, M., Muzny, D., Sabo, A., Huang, Z., Wang, J., Coin, L. J. M., Fang, L., Guo, X., Jin,  
470 X., Li, G., Li, Q., Li, Y., Li, Z., Lin, H., Liu, B., Luo, R., Shao, H., Xie, Y., Ye, C., Yu, C., Zhang,  
471 F., Zheng, H., Zhu, H., Alkan, C., Dal, E., Kahveci, F., Marth, G. T., Garrison, E. P., Kural, D., Lee,  
472 W.-P., Fung Leong, W., Stromberg, M., Ward, A. N., Wu, J., Zhang, M., Daly, M. J., DePristo, M. A.,  
473 Handsaker, R. E., Altshuler, D. M., Banks, E., Bhatia, G., del Angel, G., Gabriel, S. B., Genovese, G.,  
474 Gupta, N., Li, H., Kashin, S., Lander, E. S., McCarroll, S. A., Nemes, J. C., Poplin, R. E., Yoon, S. C.,

475 Lihm, J., Makarov, V., Clark, A. G., Gottipati, S., Keinan, A., Rodriguez-Flores, J. L., Korbel, J. O.,  
476 Rausch, T., Fritz, M. H., Stütz, A. M., Flicek, P., Beal, K., Clarke, L., Datta, A., Herrero, J., McLaren,  
477 W. M., Ritchie, G. R. S., Smith, R. E., Zerbino, D., Zheng-Bradley, X., Sabeti, P. C., Shlyakhter, I.,  
478 Schaffner, S. F., Vitti, J., Cooper, D. N., Ball, E. V., Stenson, P. D., Bentley, D. R., Barnes, B., Bauer,  
479 M., Keira Cheetham, R., Cox, A., Eberle, M., Humphray, S., Kahn, S., Murray, L., Peden, J., Shaw,  
480 R., Kenny, E. E., Batzer, M. A., Konkel, M. K., Walker, J. A., MacArthur, D. G., Lek, M., Sudbrak,  
481 R., Amstislavskiy, V. S., Herwig, R., Mardis, E. R., Ding, L., Koboldt, D. C., Larson, D., Ye, K.,  
482 Gravel, S., Swaroop, A., Chew, E., Lappalainen, T., Erlich, Y., Gymrek, M., Frederick Willems, T.,  
483 Simpson, J. T., Shriver, M. D., Rosenfeld, J. A., Bustamante, C. D., Montgomery, S. B., De La Vega,  
484 F. M., Byrnes, J. K., Carroll, A. W., DeGorter, M. K., Lacroute, P., Maples, B. K., Martin, A. R.,  
485 Moreno-Estrada, A., Shringarpure, S. S., Zakharia, F., Halperin, E., Baran, Y., Lee, C., Cerveira, E.,  
486 Hwang, J., Malhotra, A., Plewczynski, D., Radew, K., Romanovitch, M., Zhang, C., Hyland, F. C. L.,  
487 Craig, D. W., Christoforides, A., Homer, N., Izatt, T., Kurdoglu, A. A., Sinari, S. A., Squire, K.,  
488 Sherry, S. T., Xiao, C., Sebat, J., Antaki, D., Gujral, M., Noor, A., Ye, K., Burchard, E. G., Hernandez,  
489 R. D., Gignoux, C. R., Haussler, D., Katzman, S. J., James Kent, W., Howie, B., Ruiz-Linares, A.,  
490 Dermitzakis, E. T., Devine, S. E., Abecasis, G. R., Min Kang, H., Kidd, J. M., Blackwell, T., Caron,  
491 S., Chen, W., Emery, S., Fritsche, L., Fuchsberger, C., Jun, G., Li, B., Lyons, R., Scheller, C., Sidore,  
492 C., Song, S., Sliwerska, E., Taliun, D., Tan, A., Welch, R., Kate Wing, M., Zhan, X., Awadalla, P.,  
493 Hodgkinson, A., Li, Y., Shi, X., Quitadamo, A., Lunter, G., McVean, G. A., Marchini, J. L., Myers, S.,  
494 Churchhouse, C., Delaneau, O., Gupta-Hinch, A., Kretzschmar, W., Iqbal, Z., Mathieson, I., Menelaou,  
495 A., Rimmer, A., Xifara, D. K., Oleksyk, T. K., Fu, Y., Liu, X., Xiong, M., Jorde, L., Witherspoon, D.,  
496 Xing, J., Eichler, E. E., Browning, B. L., Browning, S. R., Hormozdiari, F., Sudmant, P. H., Khurana,  
497 E., Durbin, R. M., Hurles, M. E., Tyler-Smith, C., Albers, C. A., Ayub, Q., Balasubramanian, S., Chen,  
498 Y., Colonna, V., Danecek, P., Jostins, L., Keane, T. M., McCarthy, S., Walter, K., Xue, Y., Gerstein,  
499 M. B., Abyzov, A., Balasubramanian, S., Chen, J., Clarke, D., Fu, Y., Harmanci, A. O., Jin, M., Lee, D.,  
500 Liu, J., Jasmine Mu, X., Zhang, J., Zhang, Y., Li, Y., Luo, R., Zhu, H., Alkan, C., Dal, E., Kahveci, F.,  
501 Marth, G. T., Garrison, E. P., Kural, D., Lee, W.-P., Ward, A. N., Wu, J., Zhang, M., McCarroll, S. A.,  
502 Handsaker, R. E., Altshuler, D. M., Banks, E., del Angel, G., Genovese, G., Hartl, C., Li, H., Kashin, S.,  
503 Nemesi, J. C., Shakir, K., Yoon, S. C., Lihm, J., Makarov, V., Degenhardt, J., Korbel, J. O., Fritz, M. H.,  
504 Meiers, S., Raeder, B., Rausch, T., Stütz, A. M., Flicek, P., Paolo Casale, F., Clarke, L., Smith, R. E.,  
505 Stegle, O., Zheng-Bradley, X., Bentley, D. R., Barnes, B., Keira Cheetham, R., Eberle, M., Humphray,  
506 S., Kahn, S., Murray, L., Shaw, R., Lameijer, E.-W., Batzer, M. A., Konkel, M. K., Walker, J. A., Ding,  
507 L., Hall, I., Ye, K., Lacroute, P., Lee, C., Cerveira, E., Malhotra, A., Hwang, J., Plewczynski, D., Radew,  
508 K., Romanovitch, M., Zhang, C., Craig, D. W., Homer, N., Church, D., Xiao, C., Sebat, J., Antaki, D.,  
509 Bafna, V., Michaelson, J., Ye, K., Devine, S. E., Gardner, E. J., Abecasis, G. R., Kidd, J. M., Mills,  
510 R. E., Dayama, G., Emery, S., Jun, G., Shi, X., Quitadamo, A., Lunter, G., McVean, G. A., Chen, K.,  
511 Fan, X., Chong, Z., Chen, T., Witherspoon, D., Xing, J., Eichler, E. E., Chaisson, M. J., Hormozdiari,  
512 F., Huddleston, J., Malig, M., Nelson, B. J., Sudmant, P. H., Parrish, N. F., Khurana, E., Hurles, M. E.,  
513 Blackburne, B., Lindsay, S. J., Ning, Z., Walter, K., Zhang, Y., Gerstein, M. B., Abyzov, A., Chen, J.,  
514 Clarke, D., Lam, H., Jasmine Mu, X., Sisu, C., Zhang, J., Zhang, Y., Gibbs, R. A., Yu, F., Bainbridge,  
515 M., Challis, D., Evani, U. S., Kovar, C., Lu, J., Muzny, D., Nagaswamy, U., Reid, J. G., Sabo, A., Yu, J.,  
516 Guo, X., Li, W., Li, Y., Wu, R., Marth, G. T., Garrison, E. P., Fung Leong, W., Ward, A. N., del Angel,  
517 G., DePristo, M. A., Gabriel, S. B., Gupta, N., Hartl, C., Poplin, R. E., Clark, A. G., Rodriguez-Flores,  
518 J. L., Flicek, P., Clarke, L., Smith, R. E., Zheng-Bradley, X., MacArthur, D. G., Mardis, E. R., Fulton,  
519 R., Koboldt, D. C., Gravel, S., Bustamante, C. D., Craig, D. W., Christoforides, A., Homer, N., Izatt, T.,  
520 Sherry, S. T., Xiao, C., Dermitzakis, E. T., Abecasis, G. R., Min Kang, H., McVean, G. A., Gerstein,  
521 M. B., Balasubramanian, S., Habegger, L., Yu, H., Flicek, P., Clarke, L., Cunningham, F., Dunham, I.,  
522 Zerbino, D., Zheng-Bradley, X., Lage, K., Berg Jespersen, J., Horn, H., Montgomery, S. B., DeGorter,  
523 M. K., Khurana, E., Tyler-Smith, C., Chen, Y., Colonna, V., Xue, Y., Gerstein, M. B., Balasubramanian,  
524 S., Fu, Y., Kim, D., Auton, A., Marcketta, A., Desalle, R., Narechania, A., Wilson Sayres, M. A.,  
525 Garrison, E. P., Handsaker, R. E., Kashin, S., McCarroll, S. A., Rodriguez-Flores, J. L., Flicek, P.,  
526 Clarke, L., Zheng-Bradley, X., Erlich, Y., Gymrek, M., Frederick Willems, T., Bustamante, C. D.,  
527 Mendez, F. L., David Poznik, G., Underhill, P. A., Lee, C., Cerveira, E., Malhotra, A., Romanovitch,  
528 M., Zhang, C., Abecasis, G. R., Coin, L., Shao, H., Mittelman, D., Tyler-Smith, C., Ayub, Q., Banerjee,  
529 R., Cerezo, M., Chen, Y., Fitzgerald, T. W., Louzada, S., Massaia, A., McCarthy, S., Ritchie, G. R.,

- 530 Xue, Y., Yang, F., Gibbs, R. A., Kovar, C., Kalra, D., Hale, W., Muzny, D., Reid, J. G., Wang, J., Dan,  
531 X., Guo, X., Li, G., Li, Y., Ye, C., Zheng, X., Altshuler, D. M., Flicek, P., Clarke, L., Zheng-Bradley,  
532 X., Bentley, D. R., Cox, A., Humphray, S., Kahn, S., Sudbrak, R., Albrecht, M. W., Lienhard, M.,  
533 Larson, D., Craig, D. W., Izatt, T., Kurdoglu, A. A., Sherry, S. T., Xiao, C., Haussler, D., Abecasis,  
534 G. R., McVean, G. A., Durbin, R. M., Balasubramaniam, S., Keane, T. M., McCarthy, S., Stalker, J.,  
535 Bodmer, W., Bedoya, G., Ruiz-Linares, A., Cai, Z., Gao, Y., Chu, J., Peltonen, L., Garcia-Montero, A.,  
536 Orfao, A., Dutil, J., Martinez-Cruzado, J. C., Oleksyk, T. K., Barnes, K. C., Mathias, R. A., Hennis,  
537 A., Watson, H., McKenzie, C., Qadri, F., LaRocque, R., Sabeti, P. C., Zhu, J., Deng, X., Sabeti, P. C.,  
538 Asogun, D., Folarin, O., Happi, C., Omoniwa, O., Stremlau, M., Tariyal, R., Jallow, M., Sisay Joof,  
539 F., Corrah, T., Rockett, K., Kwiatkowski, D., Kooner, J., Tinh Hien, T., Dunstan, S. J., Thuy Hang,  
540 N., Fonnies, R., Garry, R., Kanneh, L., Moses, L., Sabeti, P. C., Schieffelin, J., Grant, D. S., Gallo, C.,  
541 Poletti, G., Saleheen, D., and Rasheed, A. (2015). A global reference for human genetic variation.  
542 *Nature*, 526(7571):68–74.
- 543 Huckins, L. M., Dobbyn, A., Ruderfer, D., Hoffman, G., Wang, W., Pardinas, A. F., Rajagopal, V. M.,  
544 Als, T. D., Hoang, H. T., Girdhar, K., Boocock, J., Roussos, P., Fromer, M., Kramer, R., Domenici,  
545 E., Gamazon, E., Purcell, S., Consortium, C., Gen, S. W. G. o. t. P., Group, i.-G. S. W., Demontis, D.,  
546 Borglum, A., Walters, J., O'Donovan, M., Sullivan, P. F., Owen, M., Devlin, B., Sieberts, S. K., Cox,  
547 N., Im, H. K., Sklar, P., and Stahl, E. A. (2019). Gene expression imputation across multiple brain  
548 regions reveals schizophrenia risk throughout development. *Nature Genetics*, 51(April):659–674.
- 549 Ikeda, M., Saito, T., Kondo, K., and Iwata, N. (2017a). Genome-wide association studies of bipolar  
550 disorder: A systematic review of recent findings and their clinical implications. *Psychiatry and Clinical  
551 Neurosciences Frontier Review*, 72:52–63.
- 552 Ikeda, M., Takahashi, A., Kamatani, Y., Okahisa, Y., Kunugi, H., Mori, N., Sasaki, T., Ohmori, T.,  
553 Okamoto, Y., and Kawasaki, H. (2017b). A genome-wide association study identifies two novel  
554 susceptibility loci and trans population polygenicity associated with bipolar disorder. *Molecular  
555 Psychiatry*, 23(3):639–647.
- 556 Khera, A. V., Chaffin, M., Aragam, K. G., Haas, M. E., Roselli, C., Choi, S. H., Natarajan, P., Lander,  
557 E. S., Lubitz, S. A., Ellinor, P. T., and Kathiresan, S. (2018). Genome-wide polygenic scores for  
558 common diseases identify individuals with risk equivalent to monogenic mutations. *Nature Genetics*,  
559 50(9):1219–1224.
- 560 Lachance, J. and Tishkoff, S. A. (2014). SNP ascertainment bias in population genetic analyses: Why it is  
561 important, and how to correct it. *Bioessays*, 35(9):780–786.
- 562 MacArthur, J., Bowler, E., Cerezo, M., Gil, L., Hall, P., Hastings, E., Junkins, H., McMahon, A., Milano,  
563 A., Morales, J., MayPendlington, Z., Welter, D., Burdett, T., Hindorf, L., Flicek, P., Cunningham, F.,  
564 and Parkinson, H. (2017). The new NHGRI-EBI Catalog of published genome-wide association studies  
565 (GWAS Catalog). *Nucleic Acids Research*, 45(D1):D896–D901.
- 566 Manolio, T. A., Rodriguez, L. L., Brooks, L., Abecasis, G., Ballinger, D., Daly, M., Donnelly, P., Faraone,  
567 S. V., Frazer, K., Gabriel, S., Gejman, P., Guttmacher, A., Harris, E. L., Insel, T., Kelsoe, J. R., Lander,  
568 E., McCowin, N., Mailman, M. D., Nabel, E., Ostell, J., Pugh, E., Sherry, S., Sullivan, P. F., Thompson,  
569 J. F., Warram, J., Wholley, D., Milos, P. M., and Collins, F. S. (2007). New models of collaboration in  
570 genome-wide association studies: The Genetic Association Information Network.
- 571 Manrai, A. K., Funke, B. H., Rehm, H. L., Olesen, M. S., Maron, B. A., Szolovits, P., Margulies, D. M.,  
572 Loscalzo, J., and Kohane, I. S. (2016). Genetic Misdiagnoses and the Potential for Health Disparities.  
573 *New England Journal of Medicine*, 375(7):655–665.
- 574 Marcus, J. H. and Novembre, J. (2017). Visualizing the geography of genetic variants. *Bioinformatics*,  
575 33(4):594–595.
- 576 Martin, A. R., Gignoux, C. R., Walters, R. K., Wojcik, G. L., Neale, B. M., Gravel, S., Daly, M. J.,  
577 Bustamante, C. D., and Kenny, E. E. (2017). Human Demographic History Impacts Genetic Risk  
578 Prediction across Diverse Populations. *American Journal of Human Genetics*, 100(4):635–649.
- 579 Mathias, R. A., Taub, M. A., Gignoux, C. R., Fu, W., Musharoff, S., O'Connor, T. D., Vergara, C.,  
580 Torgerson, D. G., Pino-Yanes, M., Shringarpure, S. S., Huang, L., Rafaels, N., Boorgula, M. P.,  
581 Johnston, H. R., Ortega, V. E., Levin, A. M., Song, W., Torres, R., Padhukasahasram, B., Eng, C.,  
582 Mejia-Mejia, D.-A., Ferguson, T., Qin, Z. S., Scott, A. F., Yazdanbakhsh, M., Wilson, J. G., Marrugo,  
583 J., Lange, L. A., Kumar, R., Avila, P. C., Williams, L. K., Watson, H., Ware, L. B., Olopade, C.,  
584 Olopade, O., Oliveira, R., Ober, C., Nicolae, D. L., Meyers, D., Mayorga, A., Knight-Madden, J.,

- 585 Hartert, T., Hansel, N. N., Foreman, M. G., Ford, J. G., Faruque, M. U., Dunston, G. M., Caraballo, L.,  
586 Burchard, E. G., Bleecker, E., Araujo, M. I., Herrera-Paz, E. F., Gietzen, K., Grus, W. E., Bamshad, M.,  
587 Bustamante, C. D., Kenny, E. E., Hernandez, R. D., Beaty, T. H., Ruczinski, I., Akey, J., and Barnes,  
588 K. C. (2016). A continuum of admixture in the Western Hemisphere revealed by the African Diaspora  
589 genome. *Nature Communications*, 7(1).
- 590 Mikhaylova, A. V. and Thornton, T. A. (2019). Accuracy of gene expression prediction from genotype data  
591 with PrediXcan varies across and within continental populations. *Frontiers in Genetics*, 10(APR):1–10.
- 592 Mogil, L. S., Andaleon, A., Badalamenti, A., Dickinson, S. P., Guo, X., Rotter, J. I., Johnson, W. C., Im,  
593 H. K., Liu, Y., and Wheeler, H. E. (2018). Genetic architecture of gene expression traits across diverse  
594 populations. *PLoS Genetics*, pages 1–21.
- 595 Patterson, N., Price, A. L., and Reich, D. (2006). Population structure and eigenanalysis. *PLoS genetics*,  
596 2(12):e190.
- 597 Pruim, R. J., Welch, R. P., Sanna, S., Teslovich, T. M., Chines, P. S., Gliedt, T. P., Boehnke, M., Abecasis,  
598 G. R., Willer, C. J., and Frishman, D. (2011). LocusZoom: Regional visualization of genome-wide  
599 association scan results. *Bioinformatics*, 27(13):2336–2337.
- 600 Purcell, S., Neale, B., Todd-Brown, K., Thomas, L., Ferreira, M. A., Bender, D., Maller, J., Sklar,  
601 P., de Bakker, P. I., Daly, M. J., and Sham, P. C. (2007). PLINK: A Tool Set for Whole-Genome  
602 Association and Population-Based Linkage Analyses. *The American Journal of Human Genetics*,  
603 81(3):559–575.
- 604 Quansah, E. and McGregor, N. W. (2018). Towards diversity in genomics: The emergence of neuroge-  
605 nomics in Africa? *Genomics*, 110(1):1–9.
- 606 Ripke, S., Neale, B. M., Corvin, A., Walters, J. T., Farh, K. H., Holmans, P. A., Lee, P., Bulik-Sullivan,  
607 B., Collier, D. A., Huang, H., Pers, T. H., Agartz, I., Agerbo, E., Albus, M., Alexander, M., Amin, F.,  
608 Bacanu, S. A., Begemann, M., Belliveau, R. A., Bene, J., Bergen, S. E., Bevilacqua, E., Bigdeli, T. B.,  
609 Black, D. W., Bruggeman, R., Buccola, N. G., Buckner, R. L., Byerley, W., Cahn, W., Cai, G., Campion,  
610 D., Cantor, R. M., Carr, V. J., Carrera, N., Catts, S. V., Chambert, K. D., Chan, R. C., Chen, R. Y., Chen,  
611 E. Y., Cheng, W., Cheung, E. F., Chong, S. A., Cloninger, C. R., Cohen, D., Cohen, N., Cormican, P.,  
612 Craddock, N., Crowley, J. J., Curtis, D., Davidson, M., Davis, K. L., Degenhardt, F., Del Favero, J.,  
613 Demontis, D., Dikeos, D., Dinan, T., Djurovic, S., Donohoe, G., Drapeau, E., Duan, J., Dudbridge, F.,  
614 Durmishi, N., Eichhammer, P., Eriksson, J., Escott-Price, V., Essioux, L., Fanous, A. H., Farrell, M. S.,  
615 Frank, J., Franke, L., Freedman, R., Freimer, N. B., Friedl, M., Friedman, J. I., Fromer, M., Genovese,  
616 G., Georgieva, L., Giegling, I., Giusti-Rodríguez, P., Godard, S., Goldstein, J. I., Golimbet, V., Gopal,  
617 S., Gratten, J., De Haan, L., Hammer, C., Hamshere, M. L., Hansen, M., Hansen, T., Haroutunian, V.,  
618 Hartmann, A. M., Henskens, F. A., Herms, S., Hirschhorn, J. N., Hoffmann, P., Hofman, A., Hollegaard,  
619 M. V., Hougaard, D. M., Ikeda, M., Joa, I., Julià, A., Kahn, R. S., Kalaydjieva, L., Karachanak-Yankova,  
620 S., Karjalainen, J., Kavanagh, D., Keller, M. C., Kennedy, J. L., Khrunin, A., Kim, Y., Klovins, J.,  
621 Knowles, J. A., Konte, B., Kucinskas, V., Kucinskiene, Z. A., Kuzelova-Ptackova, H., Kähler, A. K.,  
622 Laurent, C., Keong, J. L. C., Lee, S. H., Legge, S. E., Lerer, B., Li, M., Li, T., Liang, K. Y., Lieberman,  
623 J., Limborska, S., Loughland, C. M., Lubinski, J., Lönnqvist, J., Macek, M., Magnusson, P. K., Maher,  
624 B. S., Maier, W., Mallet, J., Marsal, S., Mattheisen, M., Mattingsdal, M., McCarley, R. W., McDonald,  
625 C., McIntosh, A. M., Meier, S., Meijer, C. J., Melegh, B., Melle, I., Meshulam-Gately, R. I., Metspalu,  
626 A., Michie, P. T., Milani, L., Milanova, V., Mokrab, Y., Morris, D. W., Mors, O., Murphy, K. C., Murray,  
627 R. M., Myin-Germeys, I., Müller-Myhsok, B., Nelis, M., Nenadic, I., Nertney, D. A., Nestadt, G.,  
628 Nicodemus, K. K., Nikitina-Zake, L., Nisenbaum, L., Nordin, A., O’Callaghan, E., O’Dushlaine, C.,  
629 O’Neill, F. A., Oh, S. Y., Olincy, A., Olsen, L., Van Os, J., Pantelis, C., Papadimitriou, G. N., Papiol, S.,  
630 Parkhomenko, E., Pato, M. T., Paunio, T., Pejovic-Milovancevic, M., Perkins, D. O., Pietiläinen, O.,  
631 Pimm, J., Pocklington, A. J., Powell, J., Price, A., Pulver, A. E., Purcell, S. M., Quedsted, D., Rasmussen,  
632 H. B., Reichenberg, A., Reimers, M. A., Richards, A. L., Roffman, J. L., Roussos, P., Ruderfer, D. M.,  
633 Salomaa, V., Sanders, A. R., Schall, U., Schubert, C. R., Schulze, T. G., Schwab, S. G., Scolnick,  
634 E. M., Scott, R. J., Seidman, L. J., Shi, J., Sigurdsson, E., Silagadze, T., Silverman, J. M., Sim, K.,  
635 Slominsky, P., Smoller, J. W., So, H. C., Spencer, C. C., Stahl, E. A., Stefansson, H., Steinberg, S.,  
636 Stogmann, E., Straub, R. E., Strengman, E., Strohmaier, J., Stroup, T. S., Subramaniam, M., Suvisaari,  
637 J., Svrakic, D. M., Szatkiewicz, J. P., Söderman, E., Thirumalai, S., Toncheva, D., Tosato, S., Veijola, J.,  
638 Waddington, J., Walsh, D., Wang, D., Wang, Q., Webb, B. T., Weiser, M., Wildenauer, D. B., Williams,  
639 N. M., Williams, S., Witt, S. H., Wolen, A. R., Wong, E. H., Wormley, B. K., Xi, H. S., Zai, C. C.,



- 640 Zheng, X., Zimprich, F., Wray, N. R., Stefansson, K., Visscher, P. M., Adolfsson, R., Andreassen, O. A.,  
641 Blackwood, D. H., Bramon, E., Buxbaum, J. D., Børglum, A. D., Cichon, S., Darvasi, A., Domenici,  
642 E., Ehrenreich, H., Esko, T., Gejman, P. V., Gill, M., Gurling, H., Hultman, C. M., Iwata, N., Jablensky,  
643 A. V., Jönsson, E. G., Kendler, K. S., Kirov, G., Knight, J., Lencz, T., Levinson, D. F., Li, Q. S., Liu, J.,  
644 Malhotra, A. K., McCarroll, S. A., McQuillin, A., Moran, J. L., Mortensen, P. B., Mowry, B. J., Nöthen,  
645 M. M., Ophoff, R. A., Owen, M. J., Palotie, A., Pato, C. N., Petryshen, T. L., Posthuma, D., Rietschel,  
646 M., Riley, B. P., Rujescu, D., Sham, P. C., Sklar, P., St Clair, D., Weinberger, D. R., Wendland, J. R.,  
647 Werge, T., Daly, M. J., Sullivan, P. F., and O'Donovan, M. C. (2014). Biological insights from 108  
648 schizophrenia-associated genetic loci. *Nature*, 511(7510):421–427.
- 649 Sherry, S. T. (2001). dbSNP: the NCBI database of genetic variation. *Nucleic Acids Research*, 29(1):308–  
650 311.
- 651 Sirugo, G., Williams, S. M., and Tishkoff, S. A. (2019). Commentary The Missing Diversity in Human  
652 Genetic Studies. *Cell*, 177(1):26–31.
- 653 Sklar, P., Ripke, S., Scott, L. J., Andreassen, O. A., Cichon, S., Craddock, N., Edenberg, H. J., Nurnberger  
654 Jr, J. I., Rietschel, M., Blackwood, D., Corvin, A., Flickinger, M., Guan, W., Mattingsdal, M.,  
655 McQuillin, A., Kwan, P., Wienker, T. F., Daly, M., Dudbridge, F., Holmans, P. A., Lin, D., Burmeister,  
656 M., Greenwood, T. A., Hamshere, M. L., Muglia, P., Smith, E. N., Zandi, P. P., Nievergelt, C. M.,  
657 McKinney, R., Shilling, P. D., Schork, N. J., Bloss, C. S., Foroud, T., Koller, D. L., Gershon, E. S., Liu,  
658 C., Badner, J. A., Scheftner, W. A., Lawson, W. B., Nwulia, E. A., Hipolito, M., Coryell, W., Rice, J.,  
659 Byerley, W., McMahon, F. J., Schulze, T. G., Berrettini, W., Lohoff, F. W., Potash, J. B., Mahon, P. B.,  
660 McInnis, M. G., Zöllner, S., Zhang, P., Craig, D. W., Szegler, S., Barrett, T. B., Breuer, R., Meier,  
661 S., Strohmaier, J., Witt, S. H., Tozzi, F., Farmer, A., McGuffin, P., Strauss, J., Xu, W., Kennedy, J. L.,  
662 Vincent, J. B., Matthews, K., Day, R., Ferreira, M. A., O'Dushlaine, C., Perlis, R., Raychaudhuri, S.,  
663 Ruderfer, D., Lee, P. H., Smoller, J. W., Li, J., Absher, D., Bunney, W. E., Barchas, J. D., Schatzberg,  
664 A. F., Jones, E. G., Meng, F., Thompson, R. C., Watson, S. J., Myers, R. M., Akil, H., Boehnke,  
665 M., Chambert, K., Moran, J., Scolnick, E., Djurovic, S., Melle, I., Morken, G., Gill, M., Morris, D.,  
666 Quinn, E., Mühleisen, T. W., Degenhardt, F. A., Mattheisen, M., Schumacher, J., Maier, W., Steffens,  
667 M., Propping, P., Nöthen, M. M., Anjorin, A., Bass, N., Gurling, H., Kandaswamy, R., Lawrence, J.,  
668 McGhee, K., McIntosh, A., McLean, A. W., Muir, W. J., Pickard, B. S., Breen, G., St. Clair, D., Caesar,  
669 S., Gordon-Smith, K., Jones, L., Fraser, C., Green, E. K., Grozeva, D., Jones, I. R., Kirov, G., Moskvina,  
670 V., Nikolov, I., O'Donovan, M. C., Owen, M. J., Collier, D. A., Elkin, A., Williamson, R., Young, A. H.,  
671 Ferrier, I. N., Stefansson, K., Stefansson, H., Thorgeirsson, T., Steinberg, S., Gustafsson, Ó., Bergen,  
672 S. E., Nimgaonkar, V., Hultman, C., Landén, M., Lichtenstein, P., Sullivan, P., Schalling, M., Osby, U.,  
673 Backlund, L., Frisén, L., Langstrom, N., Jamain, S., Leboyer, M., Etain, B., Bellivier, F., Petursson, H.,  
674 Sigurdsson, E., Müller-Mysok, B., Lucae, S., Schwarz, M., Fullerton, J. M., Schofield, P. R., Martin,  
675 N., Montgomery, G. W., Lathrop, M., Óskarsson, H., Bauer, M., Wright, A., Mitchell, P. B., Hautzinger,  
676 M., Reif, A., Kelsoe, J. R., and Purcell, S. M. (2011). Large-scale genome-wide association analysis of  
677 bipolar disorder identifies a new susceptibility locus near ODZ4. *Nature Genetics*, 43(10).
- 678 Smith, E. N., Bloss, C. S., Badner, J. A., Barrett, T., Belmonte, P. L., Berrettini, W., Byerley, W., Coryell,  
679 W., Craig, D., Edenberg, H. J., Eskin, E., Foroud, T., Gershon, E., Greenwood, T. A., Hipolito, M.,  
680 Koller, D. L., Lawson, W. B., Liu, C., Lohoff, F., McInnis, M. G., McMahon, F. J., Mirel, D. B.,  
681 Murray, S. S., Nievergelt, C., Nurnberger, J., Nwulia, E. A., Paschall, J., Potash, J. B., Rice, J., Schulze,  
682 T. G., Scheftner, W., Panganiban, C., Zaitlen, N., Zandi, P. P., Zöllner, S., Schork, N. J., and Kelsoe,  
683 J. R. (2009). Genome-wide association study of bipolar disorder in European American and African  
684 American individuals. *Molecular Psychiatry*, 14(8):755–763.
- 685 Stahl, E. A., Breen, G., Forstner, A. J., McQuillin, A., Ripke, S., Trubetskoy, V., Mattheisen, M., Wang, Y.,  
686 Coleman, J. R. I., Gaspar, H. A., de Leeuw, C. A., Steinberg, S., Pavlides, J. M. W., Trzaskowski, M.,  
687 Byrne, E. M., Pers, T. H., Holmans, P. A., Richards, A. L., Abbott, L., Agerbo, E., Akil, H., Albani, D.,  
688 Alliey-Rodriguez, N., Als, T. D., Anjorin, A., Antilla, V., Awasthi, S., Badner, J. A., Bækvad-Hansen,  
689 M., Barchas, J. D., Bass, N., Bauer, M., Belliveau, R., Bergen, S. E., Pedersen, C. B., Bøen, E., Boks,  
690 M. P., Boocock, J., Budde, M., Bunney, W., Burmeister, M., Bybjerg-Grauholm, J., Byerley, W., Casas,  
691 M., Cerrato, F., Cervantes, P., Chambert, K., Charney, A. W., Chen, D., Churchhouse, C., Clarke,  
692 T.-K., Coryell, W., Craig, D. W., Cruceanu, C., Curtis, D., Czerski, P. M., Dale, A. M., de Jong, S.,  
693 Degenhardt, F., Del-Favero, J., DePaulo, J. R., Djurovic, S., Dobbyn, A. L., Dumont, A., Elvsåshagen,  
694 T., Escott-Price, V., Fan, C. C., Fischer, S. B., Flickinger, M., Foroud, T. M., Forty, L., Frank, J., Fraser,

- 695 C., Freimer, N. B., Frisé, L., Gade, K., Gage, D., Garnham, J., Giambartolomei, C., Pedersen, M. G.,  
696 Goldstein, J., Gordon, S. D., Gordon-Smith, K., Green, E. K., Green, M. J., Greenwood, T. A., Grove,  
697 J., Guan, W., Guzman-Parra, J., Hamshere, M. L., Hautzinger, M., Heilbronner, U., Herms, S., Hipolito,  
698 M., Hoffmann, P., Holland, D., Huckins, L., Jamain, S., Johnson, J. S., Juréus, A., Kandaswamy,  
699 R., Karlsson, R., Kennedy, J. L., Kittel-Schneider, S., Knowles, J. A., Kogevinas, M., Koller, A. C.,  
700 Kupka, R., Lavebratt, C., Lawrence, J., Lawson, W. B., Leber, M., Lee, P. H., Levy, S. E., Li, J. Z.,  
701 Liu, C., Lucae, S., Maaser, A., MacIntyre, D. J., Mahon, P. B., Maier, W., Martinsson, L., McCarroll,  
702 S., McGuffin, P., McInnis, M. G., McKay, J. D., Medeiros, H., Medland, S. E., Meng, F., Milani, L.,  
703 Montgomery, G. W., Morris, D. W., Mühleisen, T. W., Mullins, N., Nguyen, H., Nguyen, H., Nievergelt, C. M.,  
704 Adolfsson, A. N., Nwulia, E. A., O'Donovan, C., Loohuis, L. M. O., Ori, A. P. S., Oruc, L., Ösby, U.,  
705 Perlis, R. H., Perry, A., Pfennig, A., Potash, J. B., Purcell, S. M., Regeer, E. J., Reif, A., Reinbold,  
706 C. S., Rice, J. P., Rivas, F., Rivera, M., Roussos, P., Ruderfer, D. M., Ryu, E., Sánchez-Mora, C.,  
707 Schatzberg, A. F., Scheftner, W. A., Schork, N. J., Shannon Weickert, C., Shekhtman, T., Shilling, P. D.,  
708 Sigurdsson, E., Slaney, C., Smeland, O. B., Sobell, J. L., Sørholm Hansen, C., Spijker, A. T., St Clair, D.,  
709 Steffens, M., Strauss, J. S., Streit, F., Strohmaier, J., Szlinger, S., Thompson, R. C., Thorgeirsson, T. E.,  
710 Treutlein, J., Vedder, H., Wang, W., Watson, S. J., Weickert, T. W., Witt, S. H., Xi, S., Xu, W., Young,  
711 A. H., Zandi, P., Zhang, P., Zöllner, S., Adolfsson, R., Agartz, I., Alda, M., Backlund, L., Baune, B. T.,  
712 Bellivier, F., Berrettini, W. H., Biernacka, J. M., Blackwood, D. H. R., Boehnke, M., Børglum, A. D.,  
713 Corvin, A., Craddock, N., Daly, M. J., Dannlowski, U., Esko, T., Etain, B., Frye, M., Fullerton, J. M.,  
714 Gershon, E. S., Gill, M., Goes, F., Grigoriou-Serbanescu, M., Hauser, J., Hougaard, D. M., Hultman,  
715 C. M., Jones, I., Jones, L. A., Kahn, R. S., Kirov, G., Landén, M., Leboyer, M., Lewis, C. M., Li, Q. S.,  
716 Lissowska, J., Martin, N. G., Mayoral, F., McElroy, S. L., McIntosh, A. M., McMahon, F. J., Melle,  
717 I., Metspalu, A., Mitchell, P. B., Morken, G., Mors, O., Mortensen, P. B., Müller-Myhsok, B., Myers,  
718 R. M., Neale, B. M., Nimgaonkar, V., Nordentoft, M., Nöthen, M. M., O'Donovan, M. C., Oedegaard,  
719 K. J., Owen, M. J., Paciga, S. A., Pato, C., Pato, M. T., Posthuma, D., Ramos-Quiroga, J. A., Ribasés,  
720 M., Rietschel, M., Rouleau, G. A., Schalling, M., Schofield, P. R., Schulze, T. G., Serretti, A., Smoller,  
721 J. W., Stefansson, H., Stefansson, K., Stordal, E., Sullivan, P. F., Turecki, G., Vaaler, A. E., Vieta,  
722 E., Vincent, J. B., Werge, T., Nurnberger, J. I., Wray, N. R., Di Florio, A., Edenberg, H. J., Cichon,  
723 S., Ophoff, R. A., Scott, L. J., Andreassen, O. A., Kelsoe, J., and Sklar, P. (2019). Genome-wide  
724 association study identifies 30 loci associated with bipolar disorder. *Nature Genetics*, 51:793–803.
- 725 Stephens, M. (2017). False discovery rates: A new deal. *Biostatistics*, 18(2):275–294.
- 726 Suarez, B. K., Duan, J., Sanders, A. R., Hinrichs, A. L., Jin, C. H., Hou, C., Buccola, N. G., Hale, N.,  
727 Weillbaecher, A. N., Nertney, D. A., Olincy, A., Green, S., Schaffer, A. W., Smith, C. J., Hannah,  
728 D. E., Rice, J. P., Cox, N. J., Martinez, M., Mowry, B. J., Amin, F., Silverman, J. M., Black, D. W.,  
729 Byerley, W. F., Crowe, R. R., Freedman, R., Cloninger, C. R., Levinson, D. F., and Gejman, P. V.  
730 (2006). Genomewide linkage scan of 409 European-ancestry and African American families with  
731 schizophrenia: suggestive evidence of linkage at 8p23.3-p21.2 and 11p13.1-q14.1 in the combined  
732 sample. *American journal of human genetics*, 78(2):315–333.
- 733 Wheeler, H. E., Shah, K. P., Brenner, J., Garcia, T., Aquino-Michaels, K., Cox, N. J., Nicolae, D. L., and  
734 Im, H. K. (2016). Survey of the Heritability and Sparse Architecture of Gene Expression Traits across  
735 Human Tissues. *PLoS Genetics*, 12(11):1–23.
- 736 Whiteford, H. A., Degenhardt, L., Rehm, J., Baxter, A. J., Ferrari, A. J., Erskine, H. E., Charlson, F. J.,  
737 Norman, R. E., Flaxman, A. D., Johns, N., Burstein, R., Murray, C. J., and Vos, T. (2013). Global  
738 burden of disease attributable to mental and substance use disorders: Findings from the Global Burden  
739 of Disease Study 2010. *The Lancet*, 382(9904):1575–1586.
- 740 Zhiqiang, L., Chen, J., Yu, H., He, L., Xu, Y., Zhang, D., Yi, Q., Li, C., Li, X., Shen, J., Song, Z., Ji, W.,  
741 Wang, M., Zhou, J., Chen, B., Liu, Y., Wang, J., Wang, P., Yang, P., Wang, Q., Feng, G., Liu, B., Sun,  
742 W., Li, B., He, G., Li, W., Wan, C., Xu, Q., Li, W., Wen, Z., Liu, K., Huang, F., Li, J., Ripke, S., Yue,  
743 W., Sullivan, P. F., O'Donovan, M. C., and Shi, Y. (2017). Genome-wide association analysis identifies  
744 30 new susceptibility loci for schizophrenia. *Nature Genetics*, 49(11):1576–1583.
- 745 Zhong, Y., Perera, M. A., and Gamazon, E. R. (2019). On Using Local Ancestry to Characterize the  
746 Genetic Architecture of Human Phenotypes: Genetic Regulation of Gene Expression in Multiethnic or  
747 Admixed Populations as a Model. *American Journal of Human Genetics*, 104:1–19.
